# Supplementary material
Source: Atypon-hosted journal article supplement (doi:10.5555/3524938.3525300)
Supplement: 3524938.3525300_supp.pdf [file 3524938.3525300_supp.pdf]

## A. Proof of Theorem 1

*Proof.* Define  $\phi_s(\mathbf{v}) = \phi(\mathbf{v}) + \frac{1}{2\gamma}\|\mathbf{v} - \mathbf{v}_{s-1}\|^2$ . We can see that  $\phi_s(\mathbf{v})$  is convex and smooth since  $\gamma \leq 1/L_{\mathbf{v}}$ . The smooth coefficient of  $\phi_s$  is  $\hat{L}_{\mathbf{v}} = L_{\mathbf{v}} + 1/\gamma$ . According to Theorem 2.1.5 of (Nesterov, 2004), we have

$$\|\nabla\phi_s(\mathbf{v}_s)\|^2 \leq 2\hat{L}_{\mathbf{v}}(\phi_s(\mathbf{v}_s) - \phi_s(\mathbf{v}_s^*)). \quad (5)$$

Applying Lemma 2, we have

$$E_{s-1}[\phi_s(\mathbf{v}_s) - \phi_s(\mathbf{v}_s^*)] \leq \frac{2}{\eta_s T_s} \|\mathbf{v}_{s-1} - \mathbf{v}_s^*\|^2 + \frac{1}{\eta_s T_s} (\alpha_{s-1} - \alpha^*(\mathbf{v}_s))^2 + H\eta_s^2 T_s^2 B^2 \mathbb{I}_{I_s > 1} + \frac{\eta_s(2\sigma_{\mathbf{v}}^2 + 3\sigma_{\alpha}^2)}{2K}.$$

Denote  $\mathbf{x}_{1:m_s}^k = (\mathbf{x}_1^k, \dots, \mathbf{x}_{m_s}^k)$ ,  $y_{1:m_s}^k = (y_1^k, \dots, y_{m_s}^k)$ , and  $\tilde{f}_k(\mathbf{x}_{1:m_s}^k, y_{1:m_s}^k) = \frac{\sum_{i=1}^{m_s} h(\mathbf{w}_s; \mathbf{x}_i^k) \mathbb{I}_{y_i^k=y}}{\sum_{i=1}^{m_s} \mathbb{I}_{y_i^k=y}} - E_{\mathbf{x}^k}[h(\mathbf{w}_s; \mathbf{x}^k)|y]$ . If  $\sum_{i=1}^{m_s} \mathbb{I}_{y_i^k=y} > 0$ , then  $\frac{\sum_{i=1}^{m_s} h(\mathbf{w}_s; \mathbf{x}_i^k) \mathbb{I}_{y_i^k=y}}{\sum_{i=1}^{m_s} \mathbb{I}_{y_i^k=y}}$  is an unbiased estimation of  $E_{\mathbf{x}^k}[h(\mathbf{w}_s; \mathbf{x}^k)|y]$ . Noting  $0 \leq h(\mathbf{w}; \mathbf{x}) \leq 1$ , we have  $\text{Var}(h(\mathbf{w}; \mathbf{x}^k)|y) \leq \bar{\sigma}^2 \leq 1$ . Then we know that

$$\begin{aligned} E_{\mathbf{x}_{1:m_s}^k} [(\tilde{f}_k(\mathbf{x}_{1:m_s}^k, y_{1:m_s}^k))^2 | y_{1:m_s}^k] &\leq \frac{\bar{\sigma}^2}{\sum_{i=1}^{m_s} \mathbb{I}_{y_i^k=y}} \mathbb{I}_{(\sum_{i=1}^{m_s} \mathbb{I}_{y_i^k=y} > 0)} + 1 \cdot \mathbb{I}_{(\sum_{i=1}^{m_s} \mathbb{I}_{y_i^k=y} = 0)} \\ &\leq \frac{\mathbb{I}_{(\sum_{i=1}^{m_s} \mathbb{I}_{y_i^k=y} > 0)}}{\sum_{i=1}^{m_s} \mathbb{I}_{y_i^k=y}} + \mathbb{I}_{(\sum_{i=1}^{m_s} \mathbb{I}_{y_i^k=y} = 0)}. \end{aligned} \quad (6)$$

Hence,

$$\begin{aligned} E_{s-1}[\tilde{f}_k(\mathbf{x}_{1:m_s}^k, y_{1:m_s}^k)] &= E_{y_{1:m_s}^k} [E_{\mathbf{x}_{1:m_s}^k} [(\tilde{f}_k(\mathbf{x}_{1:m_s}^k, y_{1:m_s}^k))^2 | y_{1:m_s}^k]] \\ &\leq E_{y_{1:m_s}^k} \left[ \frac{\mathbb{I}_{(\sum_{i=1}^{m_s} \mathbb{I}_{y_i^k=y} > 0)}}{\sum_{i=1}^{m_s} \mathbb{I}_{y_i^k=y}} + \mathbb{I}_{\sum_{i=1}^{m_s} \mathbb{I}_{y_i^k=y} = 0} \right] \leq \frac{1}{m_s \Pr(y_i^k = y)} + (1 - \Pr(y_i^k = y))^{m_s}. \end{aligned} \quad (7)$$

Denote

$$\begin{aligned} \alpha^*(\mathbf{v}_s) &= \arg \max_{\alpha} f(\mathbf{v}_s, \alpha) = \frac{1}{K} \sum_{k=1}^K E \left[ \frac{h(\mathbf{w}_s; \mathbf{x}^k) \mathbb{I}_{y^k=-1}}{1-p} - \frac{h(\mathbf{w}_s; \mathbf{x}^k) \mathbb{I}_{y^k=1}}{p} \right] \\ &= \frac{1}{K} \sum_{k=1}^K [E[h(\mathbf{w}_s; \mathbf{x}^k)|y^k = -1] - E[h(\mathbf{w}_s; \mathbf{x}^k)|y^k = 1]]. \end{aligned} \quad (8)$$

Therefore,

$$\begin{aligned} E_{s-1}[(\alpha_{s-1} - \alpha^*(\mathbf{v}_{s-1}))^2] &= E_{s-1} \left[ \frac{1}{K} \sum_{k=1}^K \frac{\sum_{i=1}^{m_s-1} h(\mathbf{w}_{s-1}; \mathbf{x}_i^k) \mathbb{I}_{y_i^k=-1}}{\sum_{i=1}^{m_s-1} \mathbb{I}_{y_i^k=-1}} - E \left[ \frac{1}{K} \sum_{k=1}^K h(\mathbf{w}_{s-1}; \mathbf{x}_i^k) | y = -1 \right] \right. \\ &\quad \left. + E \left[ \frac{1}{K} \sum_{k=1}^K h(\mathbf{w}_{s-1}; \mathbf{x}_i^k) | y = 1 \right] - \frac{1}{K} \sum_{k=1}^K \frac{\sum_{i=1}^{m_s-1} h(\mathbf{w}_{s-1}; \mathbf{x}_i^k) \mathbb{I}_{y_i^k=1}}{\sum_{i=1}^{m_s-1} \mathbb{I}_{y_i^k=1}} \right]^2 \\ &\leq \frac{2}{K m_{s-1} \Pr(y_i^k = -1)} + \frac{2(1 - \Pr(y_i^k = -1))^{m_s-1}}{K} + (1 - \Pr(y_i^k = -1))^{2m_s-1} \\ &\quad + \frac{2}{K m_{s-1} \Pr(y_i^k = 1)} + \frac{2(1 - \Pr(y_i^k = 1))^{m_s-1}}{K} + (1 - \Pr(y_i^k = 1))^{2m_s-1} \\ &\leq \frac{2}{K m_{s-1} p(1-p)} + \frac{3p^{m_s-1}}{K} + \frac{3(1-p)^{m_s-1}}{K} \leq 2 \left( \frac{1}{K m_{s-1} p(1-p)} + \frac{3\bar{p}^{m_s-1}}{K} \right) \\ &\leq 2 \left( \frac{1}{K m_{s-1} p(1-p)} + \frac{C}{K m_{s-1}} \right) \leq \frac{2(1+C)}{K m_{s-1} p(1-p)}, \end{aligned} \quad (9)$$

where  $C = \frac{3\tilde{p}^{\frac{1}{2\ln(1/\tilde{p})}}}{2\ln(1/\tilde{p})}$  and  $\tilde{p} = \max(p, 1-p)$ .

Since  $h(\mathbf{w}; \mathbf{x})$  is  $G_h$ -Lipschitz,  $E[h(\mathbf{w}, \mathbf{x})|y = -1] - E[h(\mathbf{w}, \mathbf{x})|y = 1]$  is  $2G_h$ -Lipschitz. It follows that

$$\begin{aligned}
 & E_{s-1}[(\alpha_{s-1} - \alpha^*(\mathbf{v}_s))^2] = E_{s-1}[(\alpha_{s-1} - \alpha^*(\mathbf{v}_{s-1}) + \alpha^*(\mathbf{v}_{s-1}) - \alpha^*(\mathbf{v}_s))^2] \\
 & \leq E_{s-1}[2(\alpha_{s-1} - \alpha^*(\mathbf{v}_{s-1}))^2 + 2(\alpha^*(\mathbf{v}_{s-1}) - \alpha^*(\mathbf{v}_s))^2] \\
 & = E_{s-1}[2(\alpha_{s-1} - \alpha^*(\mathbf{v}_s))^2] \\
 & + 2 \left\| \frac{1}{K} \sum_{k=1}^K \left[ E_{s-1}[h(\mathbf{w}_{s-1}; \mathbf{x}^k)|y^k = -1] - E_{s-1}[h(\mathbf{w}_{s-1}; \mathbf{x}^k)|y^k = 1] \right] - \left[ E_{s-1}[h(\mathbf{w}_s; \mathbf{x})|y^k = -1] - E_{s-1}[h(\mathbf{w}_s; \mathbf{x}^k)|y^k = 1] \right] \right\|^2 \\
 & \leq \frac{2(1+C)}{m_{s-1}K4p^2(1-p)^2} + 8G_h^2 E_{s-1}[\|\mathbf{v}_{s-1} - \mathbf{v}_s\|^2].
 \end{aligned} \tag{10}$$

Since  $m_{s-1} \geq \frac{1+C}{\eta_s^2 T_s \sigma_\alpha^2 p^2 (1-p)^2}$ , then we have

$$\begin{aligned}
 E[\phi_s(\mathbf{v}_s) - \phi_s(\mathbf{v}_{\phi_s}^*)] & \leq \frac{2\|\mathbf{v}_{s-1} - \mathbf{v}_{\phi_s}^*\|^2 + 8G_h^2 E[\|\mathbf{v}_{s-1} - \mathbf{v}_s\|]}{\eta_s T_s} + \frac{\eta_s \sigma_\alpha^2}{2K} + H\eta_s^2 I_s^2 B^2 \mathbb{I}_{I_s > 1} + \frac{\eta_s(2\sigma_v^2 + 3\sigma_\alpha^2)}{2K} \\
 & \leq \frac{2\|\mathbf{v}_{s-1} - \mathbf{v}_{\phi_s}^*\|^2 + 8G_h^2 E[\|\mathbf{v}_{s-1} - \mathbf{v}_s\|^2]}{\eta_s T_s} + H\eta_s^2 I_s^2 B^2 \mathbb{I}_{I_s > 1} + \frac{2\eta_s(\sigma_v^2 + \sigma_\alpha^2)}{K}.
 \end{aligned} \tag{11}$$

We define  $I'_s = 1/\sqrt{K}\eta_s = \frac{1}{K\sqrt{\eta_0}} \exp(\frac{c(s-1)}{2})$ . Applying this and (11) to (5), we get

$$\begin{aligned}
 E[\|\nabla\phi_s(\mathbf{v}_s)\|^2] & \leq 2\hat{L}_v \left[ \frac{2\|\mathbf{v}_{s-1} - \mathbf{v}_{\phi_s}^*\|^2 + 8G_h^2 E[\|\mathbf{v}_{s-1} - \mathbf{v}_s\|^2]}{\eta_s T_s} + H\eta_s^2 I_s^2 B^2 + \frac{2\eta_s(\sigma_v^2 + \sigma_\alpha^2)}{K} \right] \\
 & \leq 2\hat{L}_v \left[ \frac{2\|\mathbf{v}_{s-1} - \mathbf{v}_{\phi_s}^*\|^2 + 8G_h^2 E[\|\mathbf{v}_{s-1} - \mathbf{v}_s\|^2]}{\eta_s T_s} + H\eta_s^2 I_s^2 B^2 + \frac{2\eta_s(\sigma_v^2 + \sigma_\alpha^2)}{K} \right].
 \end{aligned} \tag{12}$$

Taking  $\gamma = \frac{1}{2L_v}$ , then  $\hat{L}_v = 3L_v$ . Note that  $\phi_s(\mathbf{v})$  is  $(\gamma^{-1} - L_v)$ -strongly convex, we have

$$\phi_s(\mathbf{v}_{s-1}) \geq \phi_s(\mathbf{v}_{\phi_s}^*) + \frac{L_v}{2} \|\mathbf{v}_{s-1} - \mathbf{v}_{\phi_s}^*\|^2. \tag{13}$$

Plugging (13) into (11), we get

$$\begin{aligned}
 & E_{s-1}[\phi(\mathbf{v}_s) + L_v \|\mathbf{v}_s - \mathbf{v}_{s-1}\|^2] \\
 & \leq \phi_s(\mathbf{v}_{\phi_s}^*) + \frac{2\|\mathbf{v}_{s-1} - \mathbf{v}_{\phi_s}^*\|^2 + 8G_h^2 E_{s-1}[\|\mathbf{v}_{s-1} - \mathbf{v}_s\|^2]}{\eta_s T_s} + H\eta_s^2 I_s^2 B^2 + \frac{2\eta_s(\sigma_v^2 + \sigma_\alpha^2)}{K} \\
 & \leq \phi_s(\mathbf{v}_{s-1}) - \frac{L_v}{2} \|\mathbf{v}_{s-1} - \mathbf{v}_{\phi_s}^*\|^2 + \\
 & \quad \frac{2\|\mathbf{v}_{s-1} - \mathbf{v}_{\phi_s}^*\|^2 + 8G_h^2 E_{s-1}[\|\mathbf{v}_{s-1} - \mathbf{v}_s\|^2]}{\eta_s T_s} + H\eta_s^2 I_s^2 B^2 + \frac{2\eta_s(\sigma_v^2 + \sigma_\alpha^2)}{K}.
 \end{aligned} \tag{14}$$

Noting  $\eta_s T_s L_v = \max(8, 8G_h^2)$  and  $\phi_s(\mathbf{v}_{s-1}) = \phi(\mathbf{v}_{s-1})$ , we rearrange terms and get

$$\frac{2\|\mathbf{v}_{s-1} - \mathbf{v}_{\phi_s}^*\|^2 + 8G_h^2 E_{s-1}[\|\mathbf{v}_{s-1} - \mathbf{v}_s\|^2]}{\eta_s T_s} \leq \phi(\mathbf{v}_{s-1}) - E_{s-1}[\phi(\mathbf{v}_s)] + H\eta_s^2 I_s^2 B^2 + \frac{2\eta_s(\sigma_v^2 + \sigma_\alpha^2)}{K}. \tag{15}$$

Combining (12) and (15), we get

$$\begin{aligned}
 E_{s-1}\|\nabla\phi_s(\mathbf{v}_s)\|^2 & \leq 2\hat{L}_v \left[ \phi(\mathbf{v}_{s-1}) - E_{s-1}[\phi(\mathbf{v}_s)] + 2H\eta_s^2 I_s^2 B^2 + \frac{4\eta_s(\sigma_v^2 + \sigma_\alpha^2)}{K} \right] \\
 & = 6L_v \left[ \phi(\mathbf{v}_{s-1}) - E_{s-1}[\phi(\mathbf{v}_s)] + 2H\eta_s^2 I_s^2 B^2 + \frac{4\eta_s(\sigma_v^2 + \sigma_\alpha^2)}{K} \right].
 \end{aligned} \tag{16}$$

Taking expectation on both sides over all randomness until  $\mathbf{v}_{s-1}$  is generated and by tower property, we have

$$E\|\nabla\phi_s(\mathbf{v}_s)\|^2 \leq 6L_{\mathbf{v}} \left( E[\phi(\mathbf{v}_{s-1}) - \phi(\mathbf{v}_\phi^*)] - E[\phi(\mathbf{v}_s) - \phi(\mathbf{v}_\phi^*)] + 2H\eta_s^2 I_s^2 B^2 + \frac{4\eta_s(\sigma_{\mathbf{v}}^2 + \sigma_{\alpha}^2)}{K} \right) \quad (17)$$

Since  $\phi(\mathbf{v})$  is  $L_{\mathbf{v}}$ -smooth and hence is  $L_{\mathbf{v}}$ -weakly convex, we have

$$\begin{aligned} \phi(\mathbf{v}_{s-1}) &\geq \phi(\mathbf{v}_s) + \langle \nabla\phi(\mathbf{v}_s), \mathbf{v}_{s-1} - \mathbf{v}_s \rangle - \frac{L_{\mathbf{v}}}{2} \|\mathbf{v}_{s-1} - \mathbf{v}_s\|^2 \\ &= \phi(\mathbf{v}_s) + \langle \nabla\phi(\mathbf{v}_s) + 2L_{\mathbf{v}}(\mathbf{v}_s - \mathbf{v}_{s-1}), \mathbf{v}_{s-1} - \mathbf{v}_s \rangle + \frac{3}{2}L_{\mathbf{v}}\|\mathbf{v}_{s-1} - \mathbf{v}_s\|^2 \\ &= \phi(\mathbf{v}_s) + \langle \nabla\phi_s(\mathbf{v}_s), \mathbf{v}_{s-1} - \mathbf{v}_s \rangle + \frac{3}{2}L_{\mathbf{v}}\|\mathbf{v}_{s-1} - \mathbf{v}_s\|^2 \\ &= \phi(\mathbf{v}_s) - \frac{1}{2L_{\mathbf{v}}} \langle \nabla\phi_s(\mathbf{v}_s), \nabla\phi_s(\mathbf{v}_s) - \nabla\phi(\mathbf{v}_s) \rangle + \frac{3}{8L_{\mathbf{v}}} \|\nabla\phi_s(\mathbf{v}_s) - \nabla\phi(\mathbf{v}_s)\|^2 \\ &= \phi(\mathbf{v}_s) - \frac{1}{8L_{\mathbf{v}}} \|\nabla\phi_s(\mathbf{v}_s)\|^2 - \frac{1}{4L_{\mathbf{v}}} \langle \nabla\phi_s(\mathbf{v}_s), \nabla\phi(\mathbf{v}_s) \rangle + \frac{3}{8L_{\mathbf{v}}} \|\nabla\phi(\mathbf{v}_s)\|^2 \end{aligned} \quad (18)$$

Rearranging terms, it yields

$$\begin{aligned} \phi(\mathbf{v}_s) - \phi(\mathbf{v}_{s-1}) &\leq \frac{1}{8L_{\mathbf{v}}} \|\nabla\phi_s(\mathbf{v}_s)\|^2 + \frac{1}{4L_{\mathbf{v}}} \langle \nabla\phi_s(\mathbf{v}_s), \nabla\phi(\mathbf{v}_s) \rangle - \frac{3}{8L_{\mathbf{v}}} \|\nabla\phi(\mathbf{v}_s)\|^2 \\ &\leq \frac{1}{8L_{\mathbf{v}}} \|\nabla\phi_s(\mathbf{v}_s)\|^2 + \frac{1}{8L_{\mathbf{v}}} (\|\nabla\phi_s(\mathbf{v}_s)\|^2 + \|\nabla\phi(\mathbf{v}_s)\|^2) - \frac{3}{8L_{\mathbf{v}}} \|\nabla\phi(\mathbf{v}_s)\|^2 \\ &= \frac{1}{4L_{\mathbf{v}}} \|\nabla\phi_s(\mathbf{v}_s)\|^2 - \frac{1}{4L_{\mathbf{v}}} \|\nabla\phi(\mathbf{v}_s)\|^2 \\ &\leq \frac{1}{4L_{\mathbf{v}}} \|\nabla\phi_s(\mathbf{v}_s)\|^2 - \frac{\mu}{2L_{\mathbf{v}}} (\phi(\mathbf{v}_s) - \phi(\mathbf{v}_\phi^*)) \end{aligned} \quad (19)$$

Define  $\Delta_s = \phi(\mathbf{v}_s) - \phi(\mathbf{v}_\phi^*)$ . Combining (17) and (19), we get

$$E[\Delta_s - \Delta_{s-1}] \leq \frac{3}{2}E[\Delta_{s-1} - \Delta_s] + 3H\eta_s^2 I_s^2 B^2 + \frac{6\eta_s(\sigma_{\mathbf{v}}^2 + \sigma_{\alpha}^2)}{K} - \frac{\mu}{2L_{\mathbf{v}}} E[\Delta_s] \quad (20)$$

Therefore,

$$\left( \frac{5}{2} + \frac{\mu}{2L_{\mathbf{v}}} \right) E[\Delta_s] \leq \frac{5}{2} E[\Delta_{s-1}] + 3H\eta_s^2 I_s^2 B^2 + \frac{6\eta_s(\sigma_{\mathbf{v}}^2 + \sigma_{\alpha}^2)}{K} \quad (21)$$

Using  $c = \frac{\mu/L_{\mathbf{v}}}{5+\mu/L_{\mathbf{v}}}$  as defined in the theorem,

$$\begin{aligned} E[\Delta_s] &\leq \frac{5L_{\mathbf{v}}}{5L_{\mathbf{v}} + \mu} E[\Delta_{s-1}] + \frac{2L_{\mathbf{v}}}{5L_{\mathbf{v}} + \mu} \left[ 3H\eta_s^2 I_s^2 B^2 + \frac{6\eta_s(\sigma_{\mathbf{v}}^2 + \sigma_{\alpha}^2)}{K} \right] \\ &= (1-c) \left[ E[\Delta_{s-1}] + \frac{2}{5} \left( 3H\eta_s^2 I_s^2 B^2 + \frac{6\eta_s(\sigma_{\mathbf{v}}^2 + \sigma_{\alpha}^2)}{K} \right) \right] \\ &\leq (1-c)^S E[\Delta_0] + \frac{6HB^2}{5} \sum_{j=1}^S \eta_j^2 I_j^2 (1-c)^{S+1-j} + \frac{12(\sigma_{\mathbf{v}}^2 + \sigma_{\alpha}^2)}{5K} \sum_{j=1}^S \eta_j (1-c)^{S+1-j} \\ &= (1-c)^S E[\Delta_0] + \frac{6HB^2}{5} \sum_{j=1}^S \eta_j^2 I_j^2 (1-c)^{S+1-j} + \frac{12(\sigma_{\mathbf{v}}^2 + \sigma_{\alpha}^2)}{5K} \sum_{j=1}^S \eta_j (1-c)^{S+1-j} \end{aligned} \quad (22)$$

We then have

$$\begin{aligned}
 E[\Delta_S] &\leq (1-c)^S E[\Delta_0] + \left( \frac{6HB^2}{5K} + \frac{12(\sigma_v^2 + \sigma_\alpha^2)}{5K} \right) \sum_{j=1}^S \eta_j (1-c)^{S+1-j} \\
 &\leq \exp(-cS) \Delta_0 + \left( \frac{6HB^2}{5K} + \frac{12(\sigma_v^2 + \sigma_\alpha^2)}{5K} \right) \sum_{j=1}^S \eta_j \exp(-c(S+1-j)) \\
 &= \exp(-cS) \Delta_0 + \left( \frac{6HB^2}{5} + \frac{12(\sigma_v^2 + \sigma_\alpha^2)}{5} \right) \eta_0 S \exp(-cS).
 \end{aligned} \tag{23}$$

To achieve  $E[\Delta_S] \leq \epsilon$ , it suffices to make

$$\exp(-cS) \Delta_0 \leq \epsilon/2 \tag{24}$$

and

$$\left( \frac{6HB^2}{5} + \frac{12(\sigma_v^2 + \sigma_\alpha^2)}{5} \right) \eta_0 S \exp(-cS) \leq \epsilon/2. \tag{25}$$

So, it suffices to make

$$S \geq c^{-1} \max \left\{ \log \left( \frac{2\Delta_0}{\epsilon} \right), \log S + \log \left[ \frac{2\eta_0}{\epsilon} \frac{6HB^2 + 12(\sigma_v^2 + \sigma_\alpha^2)}{5} \right] \right\}. \tag{26}$$

Taking summation of iteration over  $s = 1, \dots, S$ , we have the total iteration complexity as

$$\begin{aligned}
 T &= \sum_{s=1}^S T_s \leq \frac{\max\{8, 8G_h^2\} \exp(cS) - 1}{L_v \eta_0 K \exp(c) - 1} \leq \frac{\max\{8, 8G_h^2\} 5L_v + \mu}{L_v \eta_0 K \mu} \exp(cS) \\
 &= \tilde{O} \left( \max \left( \frac{\Delta_0}{\mu \epsilon \eta_0 K}, \frac{S(6HB^2 + 12(\sigma_v^2 + \sigma_\alpha^2))}{\mu \epsilon K} \right) \right) = \tilde{O} \left( \max \left( \frac{\Delta_0}{\mu \epsilon \eta_0 K}, \frac{L_v}{\mu^2 K \epsilon} \right) \right).
 \end{aligned} \tag{27}$$

To analyze the total communication complexity, we will analyze two cases: (1)  $\frac{1}{K\sqrt{\eta_0}} > 1$ ; (2)  $\frac{1}{K\sqrt{\eta_0}} \leq 1$ .

(1) If  $\frac{1}{K\sqrt{\eta_0}} > 1$ , then  $I_s = \max(1, \frac{1}{K\sqrt{\eta_0}} \exp(\frac{c(s-1)}{2})) = \frac{1}{K\sqrt{\eta_0}} \exp(\frac{c(s-1)}{2})$  for any  $s \geq 1$ .

The total number of communications:

$$\begin{aligned}
 \sum_{s=1}^S \frac{T_s}{I_s} &= \sum_{s=1}^S \frac{\max(8, 8G_h^2)}{L_v \eta_0^{1/2}} \exp \left( \frac{c(s-1)}{2} \right) = \frac{\max(8, 8G_h^2) \exp(cS/2) - 1}{L_v \eta_0^{1/2} \exp(c/2) - 1} \\
 &= \tilde{O} \left( \max \left( \frac{(2\Delta_0/\epsilon)^{1/2}}{\mu \eta_0^{1/2}}, \frac{(S(6HB^2 + 12(\sigma_v^2 + \sigma_\alpha^2)))^{1/2}}{\mu \epsilon^{1/2}} \right) \right) = \tilde{O} \left( \frac{\Delta_0^{1/2}}{\mu(\eta_0 \epsilon)^{1/2}}, \frac{L_v^{1/2}}{\mu^{3/2} \epsilon^{1/2}} \right).
 \end{aligned} \tag{28}$$

(2) If  $\frac{1}{K\sqrt{\eta_0}} \leq 1$ , then  $I_s = 1$  for  $s \leq \lceil 2c^{-1} \log(K\sqrt{\eta_0}) + 1 \rceil := S_1$  and  $I_s = \frac{1}{K\sqrt{\eta_0}} \exp(\frac{s-1}{2})$  for  $s > \frac{2(5+\mu/L_v)}{\mu/L_v} \log(K\sqrt{\eta_0}) + 1$ .

Obviously,  $S_1 \leq \frac{2(5+\mu/L_{\mathbf{v}})}{\mu/L_{\mathbf{v}}} \log(K\sqrt{\eta_0}) + 2$ . The number of iterations from  $s = 1$  to  $S_1$  is

$$\begin{aligned}
 \sum_{s=1}^{S_1} T_s &= \sum_{s=1}^{S_1} \frac{\max\{8, 8G_h^2\}}{\eta_0 L_{\mathbf{v}} K} \exp(c(s-1)) \\
 &= \frac{\max\{8, 8G_h^2\} \exp(cS_1) - 1}{\eta_0 L_{\mathbf{v}} K (\exp(c) - 1)} \\
 &\leq c^{-1} \frac{\max\{8, 8G_h^2\}}{\eta_0 L_{\mathbf{v}} K} \exp(2 \log(K\sqrt{\eta_0}) + 2c) \\
 &= c^{-1} \frac{\max\{8, 8G_h^2\}}{\eta_0 L_{\mathbf{v}} K} K^2 \eta_0 \exp\left(\frac{2\mu/L_{\mathbf{v}}}{5 + \mu/L_{\mathbf{v}}}\right) \\
 &\leq c^{-1} \max\{8, 8G_h^2\} K \exp(2).
 \end{aligned} \tag{29}$$

Thus, the total number of communications is

$$\begin{aligned}
 &\sum_{s=1}^{S_1} T_s + \sum_{s=S_1+1}^S \frac{T_s}{I_s} \\
 &= c^{-1} \max\{8, 8G_h^2\} K \exp(2) + \sum_{s=S_1+1}^S \frac{\max(8, 8G_h^2)}{L_{\mathbf{v}} \eta_0^{1/2}} \exp\left(\frac{s-1}{2} \frac{\mu/L_{\mathbf{v}}}{5 + \mu/L_{\mathbf{v}}}\right) \\
 &\leq c^{-1} \max\{8, 8G_h^2\} K \exp(2) + \sum_{s=1}^S \frac{\max(8, 8G_h^2)}{L_{\mathbf{v}} \eta_0^{1/2}} \exp\left(\frac{s-1}{2} \frac{\mu/L_{\mathbf{v}}}{5 + \mu/L_{\mathbf{v}}}\right) \\
 &\leq c^{-1} \max\{8, 8G_h^2\} K \exp(2) + \frac{\max(8, 8G_h^2)}{L_{\mathbf{v}} \eta_0^{1/2}} \frac{\exp\left(\frac{S}{2} \frac{\mu/L_{\mathbf{v}}}{5 + \mu/L_{\mathbf{v}}}\right) - 1}{\exp\left(\frac{\mu/L_{\mathbf{v}}}{2(5 + \mu/L_{\mathbf{v}})}\right) - 1} \\
 &\in O\left(\max\left(\frac{K}{\mu} + \frac{\Delta_0}{\mu \eta_0^{1/2} \epsilon^{1/2}}, \frac{K}{\mu} + \frac{L_{\mathbf{v}}^{1/2}}{\mu^{3/2} \epsilon^{1/2}}\right)\right).
 \end{aligned} \tag{30}$$

## B. Proof of Lemma 1

To prove Lemma 1, we need the following Lemma 7 and Lemma 8 to show that the trajectories of  $\alpha$ ,  $a$  and  $b$  are constrained in closed sets in Algorithm 2.

**Lemma 7** *Suppose Assumption (1) holds and  $\eta \leq \frac{1}{2p(1-p)}$ . Running Algorithm 2 with the input given by Algorithm 1, we have  $|\alpha_t^k| \leq \frac{\max\{p, (1-p)\}}{p(1-p)}$  for any iteration  $t$  and any machine  $k$ .*

*Proof.* Firstly, we need to show that the input for any call of Algorithm (2) satisfies  $|\alpha_0| \leq \frac{\max\{p, (1-p)\}}{p(1-p)}$ . If Algorithm 2 is called by Algorithm 1 for the first time, we know  $|\alpha_0| = 0 \leq \frac{\max\{p, (1-p)\}}{p(1-p)}$ . Otherwise, by the update of  $\alpha_s$  in Algorithm (1) (lines 4-7), we know that the input for Algorithm (2) satisfies  $|\alpha_0| \leq 2 \leq \frac{\max\{p, (1-p)\}}{p(1-p)}$  since  $h(\mathbf{w}; \mathbf{x}^k) \in [0, 1]$  by Assumption 1(iv).

Next, we will show by induction that  $|\alpha_t^k| \leq \frac{\max\{p, (1-p)\}}{p(1-p)}$  for any iteration  $t$  and any machine  $k$  in Algorithm 2. Obviously,  $|a_0^k| \leq 2 \leq \frac{\max\{p, (1-p)\}}{p(1-p)}$  for any  $k$ .

Assume  $|a_t^k| \leq \frac{\max\{p, (1-p)\}}{p(1-p)}$  for any  $k$ .

(1) If  $t + 1 \bmod I \neq 0$ , then we have

$$\begin{aligned}
 |\alpha_{t+1}^k| &= \left| \alpha_t^k + \eta(2(p h(\mathbf{w}_t^k; \mathbf{x}) \mathbb{I}_{[y=-1]} - (1-p) h(\mathbf{w}_t^k; \mathbf{x}) \mathbb{I}_{[y=1]}) - 2p(1-p)\alpha_t) \right| \\
 &\leq \left| (1 - 2\eta p(1-p))\alpha_t^k \right| + \left| 2\eta(p h(\mathbf{w}_t^k; \mathbf{x}) \mathbb{I}_{[y=-1]} - (1-p) h(\mathbf{w}_t^k; \mathbf{x}) \mathbb{I}_{[y=1]}) \right| \\
 &\leq (1 - 2\eta p(1-p)) \frac{\max\{p, (1-p)\}}{p(1-p)} + 2\eta \max\{p, (1-p)\} \\
 &= (1 - 2\eta p(1-p) + 2\eta p(1-p)) \frac{\max\{p, (1-p)\}}{p(1-p)} \\
 &= \frac{\max\{p, (1-p)\}}{p(1-p)}.
 \end{aligned} \tag{31}$$

(2) If  $t + 1 \bmod I = 0$ , then by same analysis as above, we know that  $|\alpha_{t+1}^k| \leq \frac{\max\{p, (1-p)\}}{p(1-p)}$  before being averaged across machines. Therefore, after being averaged across machines, it still holds that  $|\alpha_{t+1}^k| \leq \frac{\max\{p, (1-p)\}}{p(1-p)}$ .

Therefore,  $|\alpha_t^k| \leq \frac{\max\{p, (1-p)\}}{p(1-p)}$  holds for any iteration  $t$  and any machine  $k$  at any call of Algorithm (2).  $\square$

**Lemma 8** Suppose Assumption (1) (1) holds and  $\eta \leq \min(\frac{1}{2(1-p)}, \frac{1}{2p})$ . Running Algorithm 2 with the input given by Algorithm (1), we have that  $|a_t^k| \leq 1$  and  $|b_t^k| \leq 1$  for any iteration  $t$  and any machine  $k$ .

*Proof.* At the first call of Algorithm (2), the input satisfies  $|a_0| \leq 1$  and  $|b_0| \leq 1$ . Thus  $|a_0^k| \leq 1$  and  $|b_0^k| \leq 1$  for any machine  $k$ .

Assume  $|a_t^k| \leq 1$  and  $|b_t^k| \leq 1$ . Then:

(1)  $t + 1 \bmod I \neq 0$ , then we have

$$\begin{aligned}
 |a_t^k| &= \left| \frac{\gamma}{\eta + \gamma} a_{t-1}^k + \frac{\eta}{\eta + \gamma} a_0 - \frac{\eta\gamma}{\eta + \gamma} \nabla_a F_k(\mathbf{v}_{t-1}^k, \alpha_{t-1}^k, \mathbf{z}_{t-1}^k) \right| \\
 &= \left| \frac{\gamma}{\eta + \gamma} a_{t-1}^k + \frac{\eta}{\eta + \gamma} a_0 + \frac{\eta\gamma}{\eta + \gamma} (2(1-p)(h(\mathbf{w}_{t-1}^k; \mathbf{x}_{t-1}^k) - a_{t-1}^k)) \mathbb{I}_{y^k=1} \right| \\
 &= \left| \frac{\eta}{\eta + \gamma} a_0 + \frac{\gamma}{\eta + \gamma} a_{t-1}^k (1 - 2\eta(1-p)) \mathbb{I}_{y^k=1} + \frac{\eta\gamma}{\eta + \gamma} 2(1-p) h(\mathbf{w}_{t-1}^k; \mathbf{x}_{t-1}^k) \mathbb{I}_{y^k=1} \right| \\
 &\leq \left| \frac{\eta}{\eta + \gamma} a_0 \right| + \left| \frac{\gamma}{\eta + \gamma} a_{t-1}^k (1 - 2\eta(1-p)) \mathbb{I}_{y^k=1} \right| + \left| \frac{\eta\gamma}{\eta + \gamma} 2(1-p) h(\mathbf{w}_{t-1}^k; \mathbf{x}_{t-1}^k) \mathbb{I}_{y^k=1} \right| \\
 &\leq \frac{\eta}{\eta + \gamma} + \frac{\gamma}{\eta + \gamma} (1 - 2\eta(1-p)) + \frac{\eta\gamma}{\eta + \gamma} 2(1-p) \\
 &= 1.
 \end{aligned} \tag{32}$$

(2) If  $t + 1 \bmod I = 0$ , then by the same analysis as above, we have that  $|a_{t+1}^k| \leq 1$  before being averaged across machines. Therefore, after being averaged across machines, it still holds that  $|a_{t+1}^k| \leq 1$ .

Thus, we can see that  $|a_t^k| \leq 1$  holds for any iteration  $t$  and any machine  $k$  in this call of Algorithm 2. Therefore, the output of the stage also has  $|\tilde{a}| \leq 1$ .

Then we know that in the next call of Algorithm (2), the input satisfies  $|a_0| \leq 1$ , by the same proof, we can see that  $|a_t^k| \leq 1$  holds for any iteration  $t$  and any machine  $k$  in any call of Algorithm (2). With the same techniques, we can prove that  $|b_t^k|$  holds for any iteration  $t$  and any machine  $k$  in any call of Algorithm (2).  $\square$

With the above lemmas, we are ready to prove Lemma 1 and derive the claimed constants.

By definition of  $F(\mathbf{v}, \alpha; \mathbf{z})$  and noting that  $\mathbf{v} = (\mathbf{w}, a, b)$ , we have

$$\nabla_{\mathbf{v}} F_k(\mathbf{v}, \alpha; \mathbf{z}) = [\nabla_{\mathbf{w}} F_k(\mathbf{v}, \alpha; \mathbf{z})^T, \nabla_a F_k(\mathbf{v}, \alpha; \mathbf{z}), \nabla_b F_k(\mathbf{v}, \alpha; \mathbf{z})]^T. \tag{33}$$

Addressing each of the three terms on RHS, it follows that

$$\begin{aligned}\nabla_{\mathbf{w}}F_k(\mathbf{v}, \alpha; \mathbf{z}) &= \left[ 2(1-p)(h(\mathbf{w}; \mathbf{x}^k) - a) - 2(1+\alpha)(1-p) \right] \nabla h(\mathbf{w}; \mathbf{x}^k) \mathbb{I}_{[y^k=1]} \\ &\quad + \left[ 2p(h(\mathbf{w}; \mathbf{x}^k) - b) + 2(1+\alpha)p \right] \nabla h(\mathbf{w}; \mathbf{x}^k) \mathbb{I}_{[y^k=-1]}, \\ \nabla_a F_k(\mathbf{v}, \alpha; \mathbf{z}) &= -2(1-p)(h(\mathbf{w}; \mathbf{x}^k) - a) \mathbb{I}_{[y^k=1]}, \\ \nabla_b F_k(\mathbf{v}, \alpha; \mathbf{z}) &= -2p(h(\mathbf{w}; \mathbf{x}^k) - b).\end{aligned}\tag{34}$$

Since  $|h(\mathbf{w}; \mathbf{x}^k)| \in [0, 1]$ ,  $\|\nabla h(\mathbf{w}; \mathbf{x}^k)\| \leq G_h$ ,  $|\alpha| \leq \frac{\max\{p, 1-p\}}{p(1-p)}$ ,  $|a| \leq 1$  and  $b \leq 1$ , we have

$$\begin{aligned}\|\nabla_{\mathbf{w}}F_k(\mathbf{v}, \alpha; \mathbf{z})\| &\leq \|2(1-p)(h(\mathbf{w}; \mathbf{x}^k) - a) - 2(1+\alpha)(1-p)\| G_h + \|2p(h(\mathbf{w}; \mathbf{x}^k) - b) + 2(1+\alpha)p\| G_h \\ &\leq |6 + 2\alpha|(1-p)G_h + |6 + 2\alpha|pG_h \\ &\leq \left( 6 + 2\frac{\max\{p, 1-p\}}{p(1-p)} \right) G_h,\end{aligned}\tag{35}$$

$$\|\nabla_a F_k(\mathbf{v}, \alpha; \mathbf{z})\| \leq 4(1-p),\tag{36}$$

$$\|\nabla_b F_k(\mathbf{v}, \alpha; \mathbf{z})\| \leq 4p.\tag{37}$$

Thus,

$$\begin{aligned}\|\nabla_{\mathbf{v}}F_k(\mathbf{v}, \alpha; \mathbf{z})\|^2 &= \|\nabla_{\mathbf{w}}F_k(\mathbf{v}, \alpha; \mathbf{z})\|^2 + \|\nabla_a F_k(\mathbf{v}, \alpha; \mathbf{z})\|^2 + \|\nabla_b F_k(\mathbf{v}, \alpha; \mathbf{z})\|^2 \\ &\leq \left( 6 + \frac{2\max\{p, 1-p\}}{p(1-p)} \right)^2 G_h^2 + 16(1-p)^2 + 16p^2.\end{aligned}\tag{38}$$

$$\begin{aligned}\|\nabla_{\alpha}F_k(\mathbf{v}, \alpha; \mathbf{z})\|^2 &= \|2ph(\mathbf{w}; \mathbf{x}^k)\mathbb{I}_{y^k=-1} - 2(1-p)h(\mathbf{w}; \mathbf{x}^k)\mathbb{I}_{y^k=1} - 2p(1-p)\alpha\|^2 \\ &\leq (2p + 2(1-p) + 4\max\{p, 1-p\})^2 = (2 + 4\max\{p, 1-p\})^2.\end{aligned}\tag{39}$$

Thus,  $B_{\mathbf{v}}^2 = \left( 6 + \frac{2\max\{p, 1-p\}}{p(1-p)} \right)^2 G_h^2 + 16(1-p)^2 + 16p^2$  and  $B_{\alpha}^2 = (2 + 4\max\{p, 1-p\})^2$ .

It follow that

$$|\nabla_{\mathbf{v}}f_k(\mathbf{v}, \alpha)| = |E[\nabla_{\alpha}F_k(\mathbf{v}, \alpha; \mathbf{z}^k)]| \leq B_{\mathbf{v}}.\tag{40}$$

Therefore,

$$E[\|\nabla_{\mathbf{v}}f_k(\mathbf{v}, \alpha) - \nabla_{\mathbf{v}}F_k(\mathbf{v}, \alpha; \mathbf{z}^k)\|^2] \leq 2|\nabla_{\mathbf{v}}f_k(\mathbf{v}, \alpha)|^2 + 2E[\nabla_{\mathbf{v}}F_k(\mathbf{v}, \alpha; \mathbf{z}^k)]^2 \leq 4B_{\mathbf{v}}^2.\tag{41}$$

Similarly,

$$|\nabla_{\alpha}f_k(\mathbf{w}, a, b, \alpha)| = |E[\nabla_{\alpha}F_k(\mathbf{w}, a, b, \alpha; \mathbf{z}^k)]| \leq B_{\alpha}.\tag{42}$$

Therefore,

$$E[\|\nabla_{\alpha}f_k(\mathbf{v}, \alpha) - \nabla_{\alpha}F_k(\mathbf{v}, \alpha; \mathbf{z}^k)\|^2] \leq 2|\nabla_{\alpha}f_k(\mathbf{v}, \alpha)|^2 + 2E[F_k(\mathbf{v}, \alpha; \mathbf{z}^k)]^2 \leq 4B_{\alpha}^2.\tag{43}$$

Thus,  $\sigma_{\mathbf{v}}^2 = 4B_{\mathbf{v}}^2$  and  $\sigma_{\alpha}^2 = 4B_{\alpha}^2$ .

Now, it remains to derive the constant  $L_2$  such that  $\|\nabla_{\mathbf{v}} F_k(\mathbf{v}_1, \alpha; \mathbf{z}) - \nabla_{\mathbf{v}} F_k(\mathbf{v}_2, \alpha; \mathbf{z})\| \leq L_2 \|\mathbf{v}_1 - \mathbf{v}_2\|$ .

By (34), we get

$$\begin{aligned}
 & \|\nabla_{\mathbf{w}} F_k(\mathbf{v}_1, \alpha; \mathbf{z}) - \nabla_{\mathbf{w}} F_k(\mathbf{v}_2, \alpha; \mathbf{z})\| \\
 &= \left\| \left[ 2(1-p)(h(\mathbf{w}_1; \mathbf{x}^k) - a_1) - 2(1+\alpha)(1-p) \right] \nabla h(\mathbf{w}_1; \mathbf{x}^k) \mathbb{I}_{[y^k=1]} + \left[ 2p(h(\mathbf{w}_1; \mathbf{x}^k) - b_1) + 2(1+\alpha)p \right] \nabla h(\mathbf{w}_1; \mathbf{x}^k) \mathbb{I}_{[y^k=-1]} \right. \\
 &\quad \left. - \left[ 2(1-p)(h(\mathbf{w}_2; \mathbf{x}^k) - a_2) - 2(1+\alpha)(1-p) \right] \nabla h(\mathbf{w}_2; \mathbf{x}^k) \mathbb{I}_{[y^k=1]} - \left[ 2p(h(\mathbf{w}_2; \mathbf{x}^k) - b_2) + 2(1+\alpha)p \right] \nabla h(\mathbf{w}_2; \mathbf{x}^k) \mathbb{I}_{[y^k=-1]} \right\| \\
 &= \left\| 2(1-p) \left[ h(\mathbf{w}_1; \mathbf{x}^k) \nabla h(\mathbf{w}_1; \mathbf{x}^k) - h(\mathbf{w}_2; \mathbf{x}^k) \nabla h(\mathbf{w}_2; \mathbf{x}^k) \right] \mathbb{I}_{[y^k=1]} + 2p \left[ h(\mathbf{w}_1; \mathbf{x}^k) \nabla h(\mathbf{w}_1; \mathbf{x}^k) - h(\mathbf{w}_2; \mathbf{x}^k) \nabla h(\mathbf{w}_2; \mathbf{x}^k) \right] \mathbb{I}_{[y^k=-1]} \right. \\
 &\quad \left. - (2(1+\alpha))(1-p)(\nabla h(\mathbf{w}_1; \mathbf{x}^k) - \nabla h(\mathbf{w}_2; \mathbf{x}^k)) \mathbb{I}_{[y^k=1]} + (2(1+\alpha)p)(\nabla h(\mathbf{w}_1; \mathbf{x}^k) - \nabla h(\mathbf{w}_2; \mathbf{x}^k)) \mathbb{I}_{[y^k=-1]} \right. \\
 &\quad \left. - 2(1-p)(a_1 \nabla h(\mathbf{w}_1; \mathbf{x}^k) - a_2 \nabla h(\mathbf{w}_2; \mathbf{x}^k)) \mathbb{I}_{[y^k=1]} - 2p(b_1 \nabla h(\mathbf{w}_1; \mathbf{x}^k) - b_2 \nabla h(\mathbf{w}_2; \mathbf{x}^k)) \mathbb{I}_{[y^k=-1]} \right\| \\
 &\leq 2(1-p) \|h(\mathbf{w}_1; \mathbf{x}^k) \nabla h(\mathbf{w}_1; \mathbf{x}^k) - h(\mathbf{w}_2; \mathbf{x}^k) \nabla h(\mathbf{w}_2; \mathbf{x}^k)\| + 2p \|h(\mathbf{w}_1; \mathbf{x}^k) \nabla h(\mathbf{w}_1; \mathbf{x}^k) - h(\mathbf{w}_2; \mathbf{x}^k) \nabla h(\mathbf{w}_2; \mathbf{x}^k)\| \\
 &\quad + \|2(1+\alpha)(1-p)\| \|\nabla h(\mathbf{w}_1; \mathbf{x}^k) - \nabla h(\mathbf{w}_2; \mathbf{x}^k)\| + \|2(1+\alpha)p\| \|\nabla h(\mathbf{w}_1; \mathbf{x}^k) - \nabla h(\mathbf{w}_2; \mathbf{x}^k)\| \\
 &\quad + 2(1-p) \|a_1 \nabla h(\mathbf{w}_1; \mathbf{x}^k) - a_2 \nabla h(\mathbf{w}_2; \mathbf{x}^k)\| + 2p \|b_1 \nabla h(\mathbf{w}_1; \mathbf{x}^k) - b_2 \nabla h(\mathbf{w}_2; \mathbf{x}^k)\|.
 \end{aligned} \tag{44}$$

Denoting  $\Gamma_1(\mathbf{w}; \mathbf{x}^k) = h(\mathbf{w}; \mathbf{x}^k) \nabla h(\mathbf{w}; \mathbf{x}^k)$ ,

$$\begin{aligned}
 \|\nabla \Gamma_1(\mathbf{w}; \mathbf{x}^k)\| &= \|\nabla h(\mathbf{w}; \mathbf{x}^k) \nabla h(\mathbf{w}; \mathbf{x}^k)^T + h(\mathbf{w}; \mathbf{x}^k) \nabla^2 h(\mathbf{w}; \mathbf{x}^k)\| \\
 &\leq \|\nabla h(\mathbf{w}; \mathbf{x}^k) \nabla h(\mathbf{w}; \mathbf{x}^k)^T\| + \|h(\mathbf{w}; \mathbf{x}^k) \nabla^2 h(\mathbf{w}; \mathbf{x}^k)\| \\
 &\leq G_h^2 + L_h.
 \end{aligned} \tag{45}$$

Thus,  $\|\Gamma_1(\mathbf{w}_1; \mathbf{x}^k) - \Gamma_1(\mathbf{w}_2; \mathbf{x}^k)\| = \|h(\mathbf{w}_1; \mathbf{x}^k) h'(\mathbf{w}_1; \mathbf{x}^k) - h(\mathbf{w}_2; \mathbf{x}^k) h'(\mathbf{w}_2; \mathbf{x}^k)\| \leq (G_h^2 + L_h) \|\mathbf{w}_1 - \mathbf{w}_2\|$ . Define  $\Gamma_2(\mathbf{w}, \alpha; \mathbf{x}^k) = a \nabla h(\mathbf{w}; \mathbf{x}^k)$ . By Lemma 8 and Assumption 1, we have

$$\nabla_{\mathbf{w}, a} \Gamma_2(\mathbf{w}, a; \mathbf{x}^k) \leq \|\nabla_{\mathbf{w}} \Gamma_2(\mathbf{w}, a; \mathbf{z}^k)\| + \|\nabla_a \Gamma_2(\mathbf{w}, a; \mathbf{z}^k)\| = \|a \nabla^2 h(\mathbf{w}; \mathbf{x}^k)\| + \|\nabla h(\mathbf{w}; \mathbf{x}^k)\| \leq L_h + G_h. \tag{46}$$

Therefore,

$$\|\Gamma_2(\mathbf{w}_1, a_1; \mathbf{x}^k) - \Gamma_2(\mathbf{w}_2, a_2; \mathbf{x}^k)\| = \|a_1 \nabla h(\mathbf{w}_1; \mathbf{x}^k) - a_2 \nabla h(\mathbf{w}_2; \mathbf{x}^k)\| \leq (L_h + G_h) \sqrt{\|\mathbf{w}_1 - \mathbf{w}_2\|^2 + \|a_1 - a_2\|^2}. \tag{47}$$

Similarly, we can prove that

$$\|b_1 \nabla h(\mathbf{w}_1; \mathbf{x}^k) - b_2 \nabla h(\mathbf{w}_2; \mathbf{x}^k)\| \leq (L_h + G_h) \sqrt{\|\mathbf{w}_1 - \mathbf{w}_2\|^2 + \|b_1 - b_2\|^2}. \tag{48}$$

Then plugging (47), (48) and Assumption 1 into (44), we have

$$\begin{aligned}
 & \|\nabla_{\mathbf{w}} F_k(\mathbf{v}_1, \alpha; \mathbf{z}) - \nabla_{\mathbf{w}} F_k(\mathbf{v}_2, \alpha; \mathbf{z})\| \\
 &\leq 2(G_h^2 + L_h) \|\mathbf{w}_1 - \mathbf{w}_2\| + 2|1 + \alpha| G_h \|\mathbf{w}_1 - \mathbf{w}_2\| \\
 &\quad + (L_h + G_h) \sqrt{\|\mathbf{w}_1 - \mathbf{w}_2\|^2 + \|a_1 - a_2\|^2} + (L_h + G_h) \sqrt{\|\mathbf{w}_1 - \mathbf{w}_2\|^2 + \|b_1 - b_2\|^2} \\
 &\leq (2(G_h^2 + L_h) + |2(1 + \alpha)| G_h + 2L_h + 2G_h) \sqrt{\|\mathbf{w}_1 - \mathbf{w}_2\|^2 + \|a_1 - a_2\|^2 + \|b_1 - b_2\|^2} \\
 &\leq \left( 2G_h^2 + 4L_h + \left( 4 + \frac{2 \max\{p, 1-p\}}{p(1-p)} \right) G_h \right) \|\mathbf{v}_1 - \mathbf{v}_2\|.
 \end{aligned} \tag{49}$$

By (34), we also have

$$\begin{aligned}
 \|\nabla_a F_k(\mathbf{v}_1, \alpha; \mathbf{z}) - \nabla_a F_k(\mathbf{v}_2, \alpha; \mathbf{z})\|^2 &\leq 4(1-p)^2 (\|h(\mathbf{w}_1; \mathbf{x}^k) - h(\mathbf{w}_2; \mathbf{x}^k)\|^2 + \|a_1 - a_2\|^2) \\
 &\leq 4(1-p)^2 (G_h^2 \|\mathbf{w}_1 - \mathbf{w}_2\|^2 + \|a_1 - a_2\|^2 + \|b_1 - b_2\|^2) \leq 4(1-p)^2 (G_h^2 + 1) \|\mathbf{v}_1 - \mathbf{v}_2\|^2,
 \end{aligned} \tag{50}$$



and

$$\begin{aligned} \|\nabla_b F_k(\mathbf{v}_1, \alpha; \mathbf{z}) - \nabla_b F_k(\mathbf{v}_2, \alpha; \mathbf{z})\|^2 &\leq 4(1-p)^2 (\|h(\mathbf{w}_1; \mathbf{x}^k) - h(\mathbf{w}_2; \mathbf{x}^k)\|^2 + \|b_1 - b_2\|^2) \\ &\leq 4(1-p)^2 (G_h^2 \|\mathbf{w}_1 - \mathbf{w}_2\|^2 + \|a_1 - a_2\|^2 + \|b_1 - b_2\|^2) \leq 4(1-p)^2 (G_h^2 + 1) \|\mathbf{v}_1 - \mathbf{v}_2\|^2. \end{aligned} \quad (51)$$

$$\begin{aligned} \|\nabla_{\mathbf{v}} F_k(\mathbf{v}_1, \alpha; \mathbf{z}) - \nabla_{\mathbf{v}} F_k(\mathbf{v}_2, \alpha; \mathbf{z})\|^2 &= \|\nabla_{\mathbf{w}} F_k(\mathbf{v}_1, \alpha; \mathbf{z}) - \nabla_{\mathbf{w}} F_k(\mathbf{v}_2, \alpha; \mathbf{z})\|^2 \\ &\quad + \|\nabla_a F_k(\mathbf{v}_1, \alpha; \mathbf{z}) - \nabla_a F_k(\mathbf{v}_2, \alpha; \mathbf{z})\|^2 + \|\nabla_b F_k(\mathbf{v}_1, \alpha; \mathbf{z}) - \nabla_b F_k(\mathbf{v}_2, \alpha; \mathbf{z})\|^2 \\ &\leq \left( G_h^2 + L_h + 4 + \frac{2 \max\{p, 1-p\}}{p(1-p)} 8(1-p)^2 (G_h^2 + 1) \right) \|\mathbf{v}_1 - \mathbf{v}_2\|^2. \end{aligned} \quad (52)$$

Thus, we get  $L_2 = \left( G_h^2 + L_h + 4 + \frac{2 \max\{p, 1-p\}}{p(1-p)} 8(1-p)^2 (G_h^2 + 1) \right)^{1/2}$ .

### C. Proof of Lemma 2

*Proof.* Plugging Lemma 4 and Lemma 5 into Lemma 3, we get

$$\begin{aligned} &\psi(\tilde{\mathbf{v}}) - \psi(\mathbf{v}_\psi^*) \\ &\leq \frac{1}{T} \sum_{t=1}^T \left[ \underbrace{\left( \frac{L_{\mathbf{v}} + 3G_\alpha^2/\mu_\alpha}{2} - \frac{1}{2\eta} \right) \|\tilde{\mathbf{v}}_{t-1} - \tilde{\mathbf{v}}_t\|^2 + \left( \frac{L_\alpha + 3G_{\mathbf{v}}^2/L_{\mathbf{v}}}{2} - \frac{1}{2\eta} \right) (\tilde{\alpha}_t - \tilde{\alpha}_{t-1})^2}_{C_1} \right. \\ &\quad + \underbrace{\left( \frac{1}{2\eta} - \frac{\mu_\alpha}{3} \right) (\tilde{\alpha}_{t-1} - \alpha^*(\tilde{\mathbf{v}}))^2 - \left( \frac{1}{2\eta} - \frac{\mu_\alpha}{3} \right) (\tilde{\alpha}_t - \alpha^*(\tilde{\mathbf{v}}))^2}_{C_2} + \underbrace{\left( \frac{2L_{\mathbf{v}}}{3} + \frac{1}{2\eta} \right) \|\tilde{\mathbf{v}}_{t-1} - \mathbf{v}_\psi^*\|^2 - \left( \frac{1}{2\eta} + \frac{2L_{\mathbf{v}}}{3} \right) \|\tilde{\mathbf{v}}_t - \mathbf{v}_\psi^*\|^2}_{C_3} \\ &\quad + \underbrace{\frac{1}{2\eta} ((\alpha^*(\tilde{\mathbf{v}}) - \tilde{\alpha}_{t-1})^2 - (\alpha^*(\tilde{\mathbf{v}}) - \tilde{\alpha}_t)^2)}_{C_4} + \underbrace{\left( \frac{3G_{\mathbf{v}}^2}{2\mu_\alpha} + \frac{3L_{\mathbf{v}}}{2} \right) \frac{1}{K} \sum_{k=1}^K \|\tilde{\mathbf{v}}_{t-1} - \mathbf{v}_{t-1}^k\|^2 + \left( \frac{3G_\alpha^2}{2L_{\mathbf{v}}} + \frac{3L_\alpha^2}{2\mu_\alpha} \right) \frac{1}{K} \sum_{k=1}^K (\tilde{\alpha}_{t-1} - \alpha_{t-1}^k)^2}_{C_5} \\ &\quad + \eta \underbrace{\left\| \frac{1}{K} \sum_{k=1}^K [\nabla_{\mathbf{v}} f_k(\mathbf{v}_{t-1}^k, \alpha_{t-1}^k) - \nabla_{\mathbf{v}} F_k(\mathbf{v}_{t-1}, \alpha_{t-1}; \mathbf{z}_{t-1}^k)] \right\|^2}_{C_6} + \frac{3\eta}{2} \underbrace{\left\| \frac{1}{K} \sum_{k=1}^K \nabla_\alpha f_k(\mathbf{v}_{t-1}, \alpha_{t-1}) - \nabla_\alpha F_k(\mathbf{v}_{t-1}, \alpha_{t-1}; \mathbf{z}_{t-1}^k) \right\|^2}_{C_7} \\ &\quad \left. + \underbrace{\left\langle \frac{1}{K} \sum_{k=1}^K [\nabla_{\mathbf{v}} f_k(\mathbf{v}_{t-1}, \alpha_{t-1}^k) - \nabla_{\mathbf{v}} F_k(\mathbf{v}_{t-1}, \alpha_{t-1}; \mathbf{z}_{t-1}^k)], \tilde{\mathbf{v}}_t - \mathbf{v}_\psi^* \right\rangle}_{C_8} + \underbrace{\left\langle \frac{1}{K} \sum_{k=1}^K [\nabla_\alpha f_k(\mathbf{v}_{t-1}, \alpha_{t-1}^k) - \nabla_\alpha F_k(\mathbf{v}_{t-1}, \alpha_{t-1}; \mathbf{z}_{t-1}^k)], \tilde{\alpha}_{t-1} - \hat{\alpha}_t \right\rangle}_{C_9} \right]. \end{aligned} \quad (53)$$

Since  $\eta \leq \min\left(\frac{1}{L_{\mathbf{v}} + 3G_\alpha^2/\mu_\alpha}, \frac{1}{L_\alpha + 3G_{\mathbf{v}}^2/L_{\mathbf{v}}}\right)$ , thus in the RHS of (53),  $C_1$  can be cancelled.  $C_2$ ,  $C_3$  and  $C_4$  will be handled by telescoping sum.  $C_5$  can be bounded by Lemma 6.

Taking expectation over  $C_6$ ,

$$\begin{aligned}
 & E \left[ \eta \left\| \frac{1}{K} \sum_{k=1}^K [\nabla_{\mathbf{v}} f_k(\mathbf{v}_{t-1}^k, \alpha_{t-1}^k) - \nabla_{\mathbf{v}} F_k(\mathbf{v}_{t-1}^k, \alpha_{t-1}^k; \mathbf{z}_{t-1}^k)] \right\|^2 \right] \\
 &= E \left[ \frac{\eta}{K^2} \left\| \sum_{k=1}^K [\nabla_{\mathbf{v}} f_k(\mathbf{v}_{t-1}^k, \alpha_{t-1}^k) - \nabla_{\mathbf{v}} F_k(\mathbf{v}_{t-1}^k, \alpha_{t-1}^k; \mathbf{z}_{t-1}^k)] \right\|^2 \right] \\
 &= E \left[ \frac{\eta}{K^2} \left( \sum_{k=1}^K \|\nabla_{\mathbf{v}} f_k(\mathbf{v}_{t-1}^k, \alpha_{t-1}^k) - \nabla_{\mathbf{v}} F_k(\mathbf{v}_{t-1}^k, \alpha_{t-1}^k; \mathbf{z}_{t-1}^k)\|^2 \right. \right. \\
 &\quad \left. \left. + 2 \sum_{i=1}^K \sum_{j=i+1}^K \left\langle \nabla_{\mathbf{v}} f_i(\mathbf{v}_{t-1}^i, \alpha_{t-1}^i) - \nabla_{\mathbf{v}} F_i(\mathbf{v}_{t-1}^i, \alpha_{t-1}^i; \mathbf{z}_{t-1}^i), \nabla_{\mathbf{v}} f_j(\mathbf{v}_{t-1}^j, \alpha_{t-1}^j) - \nabla_{\mathbf{v}} F_j(\mathbf{v}_{t-1}^j, \alpha_{t-1}^j; \mathbf{z}_{t-1}^j) \right\rangle \right) \right] \\
 &\leq \frac{\eta \sigma_{\mathbf{v}}^2}{K}.
 \end{aligned} \tag{54}$$

The last inequality holds because  $\|\nabla_{\mathbf{v}} f_k(\mathbf{v}_{t-1}^k, \alpha_{t-1}^k) - \nabla_{\mathbf{v}} F_k(\mathbf{v}_{t-1}^k, \alpha_{t-1}^k; \mathbf{z}_{t-1}^k)\|^2 \leq \sigma_{\mathbf{v}}^2$  for any  $k$  and  $E \left[ \left\langle \nabla_{\mathbf{v}} f_i(\mathbf{v}_{t-1}^i, \alpha_{t-1}^i) - \nabla_{\mathbf{v}} F_i(\mathbf{v}_{t-1}^i, \alpha_{t-1}^i; \mathbf{z}_{t-1}^i), \nabla_{\mathbf{v}} f_j(\mathbf{v}_{t-1}^j, \alpha_{t-1}^j) - \nabla_{\mathbf{v}} F_j(\mathbf{v}_{t-1}^j, \alpha_{t-1}^j; \mathbf{z}_{t-1}^j) \right\rangle \right] = 0$  for any  $i \neq j$  as each machine draws data independently. Similarly, we take expectation over  $C_7$  and have

$$E \left[ \frac{3\eta}{2} \left( \frac{1}{K} \sum_{k=1}^K [\nabla_{\alpha} f_k(\mathbf{v}_{t-1}^k, \alpha_{t-1}^k) - \nabla_{\alpha} F_k(\mathbf{v}_{t-1}^k, \alpha_{t-1}^k; \mathbf{z}_{t-1}^k)] \right)^2 \right] \leq \frac{3\eta \sigma_{\alpha}^2}{2K}. \tag{55}$$

Note  $E \left[ \left\langle \frac{1}{K} \sum_{k=1}^K [\nabla_{\mathbf{v}} f_k(\mathbf{v}_{t-1}^k, \alpha_{t-1}^k) - \nabla_{\mathbf{v}} F_k(\mathbf{v}_{t-1}^k, \alpha_{t-1}^k; \mathbf{z}_{t-1}^k)], \hat{\mathbf{v}}_t - \mathbf{v}_{\psi}^* \right\rangle \right] = 0$  and

$E \left[ \left\langle -\frac{1}{K} \sum_{k=1}^K [\nabla_{\alpha} f_k(\mathbf{v}_{t-1}^k, \alpha_{t-1}^k) - \nabla_{\alpha} F_k(\mathbf{v}_{t-1}^k, \alpha_{t-1}^k; \mathbf{z}_{t-1}^k)], \tilde{\alpha}_{t-1} - \hat{\alpha}_t \right\rangle \right] = 0$ . Therefore,  $C_8$  and  $C_9$  will diminish after taking expectation.

As  $\eta \leq \frac{1}{L_{\mathbf{v}} + 3G_{\alpha}^2/\mu_{\alpha}}$ , we have  $L_{\mathbf{v}} \leq \frac{1}{\eta}$ . Plugging (54) and (55) into (53), and taking expectation, it yields

$$\begin{aligned}
 E[\psi(\tilde{\mathbf{v}}) - \psi(\mathbf{v}_{\psi}^*)] &\leq E \left\{ \frac{1}{T} \left( \frac{2L_{\mathbf{v}}}{3} + \frac{1}{2\eta} \right) \|\bar{\mathbf{v}}_0 - \mathbf{v}_{\psi}^*\|^2 + \frac{1}{T} \left( \frac{1}{2\eta} - \frac{\mu_{\alpha}}{3} \right) (\bar{\alpha}_0 - \alpha^*(\tilde{\mathbf{v}}))^2 + \frac{1}{2\eta T} (\tilde{\alpha}_0 - \alpha^*(\tilde{\mathbf{v}}))^2 \right. \\
 &\quad \left. + \frac{1}{T} \sum_{t=1}^T \left( \frac{3G_{\mathbf{v}}^2}{2\mu_{\alpha}} + \frac{3L_{\mathbf{v}}}{2} \right) \frac{1}{K} \sum_{k=1}^K \|\bar{\mathbf{v}}_{t-1} - \mathbf{v}_{t-1}^k\|^2 + \frac{1}{T} \sum_{t=1}^T \left( \frac{3G_{\alpha}^2}{2L_{\mathbf{v}}} + \frac{3L_{\alpha}^2}{2\mu_{\alpha}} \right) \frac{1}{K} \sum_{k=1}^K \|\tilde{\alpha}_{t-1} - \alpha_{t-1}^k\|^2 \right. \\
 &\quad \left. + \frac{1}{T} \sum_{t=1}^T \frac{\eta \sigma_{\mathbf{v}}^2}{K} + \frac{1}{T} \sum_{t=1}^T \frac{3\eta \sigma_{\alpha}^2}{2K} \right\} \\
 &\leq \frac{2}{\eta T} \|\mathbf{v}_0 - \mathbf{v}_{\psi}^*\|^2 + \frac{1}{\eta T} (\alpha_0 - \alpha^*(\tilde{\mathbf{v}}))^2 + \left( \frac{6G_{\mathbf{v}}^2}{\mu_{\alpha}} + 6L_{\mathbf{v}} + \frac{6G_{\alpha}^2}{L_{\mathbf{v}}} + \frac{6L_{\alpha}^2}{\mu_{\alpha}} \right) \eta^2 T^2 B^2 \mathbb{I}_{I>1} + \frac{\eta(2\sigma_{\mathbf{v}}^2 + 3\sigma_{\alpha}^2)}{2K},
 \end{aligned}$$

where we use Lemma 6,  $\mathbf{v}_0 = \bar{\mathbf{v}}_0$ ,  $\alpha_0 = \bar{\alpha}_0$  and  $B^2 = \max\{B_{\mathbf{v}}^2, B_{\alpha}^2\}$  in the last inequality.  $\square$

## D. Proof of Lemma 3

*Proof.* Define  $\alpha^*(\tilde{\mathbf{v}}) = \arg \max_{\alpha} f(\tilde{\mathbf{v}}, \alpha)$  and  $\tilde{\alpha} = \frac{1}{K} \sum_{k=1}^K \frac{1}{T} \sum_{t=1}^T \alpha_t^k$ .

$$\begin{aligned}
 \psi(\tilde{\mathbf{v}}) - \min_{\mathbf{v}} \psi(\mathbf{v}) &= \max_{\alpha} \left[ f(\tilde{\mathbf{v}}, \alpha) + \frac{1}{2\gamma} \|\tilde{\mathbf{v}} - \mathbf{v}_0\|^2 \right] - \min_{\mathbf{v}} \max_{\alpha} \left[ f(\mathbf{v}, \alpha) + \frac{1}{2\gamma} \|\mathbf{v} - \mathbf{v}_0\|^2 \right] \\
 &= \left[ f(\tilde{\mathbf{v}}, \alpha^*(\tilde{\mathbf{v}})) + \frac{1}{2\gamma} \|\tilde{\mathbf{v}} - \mathbf{v}_0\|^2 \right] - \max_{\alpha} \left[ f(\mathbf{v}_{\psi}^*, \alpha) + \frac{1}{2\gamma} \|\mathbf{v}_{\psi}^* - \mathbf{v}_0\|^2 \right] \\
 &\leq \left[ f(\tilde{\mathbf{v}}, \alpha^*(\tilde{\mathbf{v}})) + \frac{1}{2\gamma} \|\tilde{\mathbf{v}} - \mathbf{v}_0\|^2 \right] - \left[ f(\mathbf{v}_{\psi}^*, \tilde{\alpha}) + \frac{1}{2\gamma} \|\mathbf{v}_{\psi}^* - \mathbf{v}_0\|^2 \right] \\
 &\leq \frac{1}{T} \sum_{t=1}^T \left[ \left( f(\bar{\mathbf{v}}_t, \alpha^*(\tilde{\mathbf{v}})) + \frac{1}{2\gamma} \|\bar{\mathbf{v}}_t - \mathbf{v}_0\|^2 \right) - \left( f(\mathbf{v}_{\psi}^*, \bar{\alpha}_t) + \frac{1}{2\gamma} \|\mathbf{v}_{\psi}^* - \mathbf{v}_0\|^2 \right) \right],
 \end{aligned} \tag{56}$$

where the last inequality uses Jensen's inequality and the fact that  $f(\mathbf{v}, \alpha) + \frac{1}{2\gamma} \|\mathbf{v} - \mathbf{v}_0\|^2$  is convex w.r.t.  $\mathbf{v}$  and concave w.r.t.  $\alpha$ .

By  $L_{\mathbf{v}}$ -weakly convexity of  $f(\cdot)$  w.r.t.  $\mathbf{v}$ , we have

$$f(\bar{\mathbf{v}}_{t-1}, \bar{\alpha}_{t-1}) + \langle \nabla_{\mathbf{v}} f(\bar{\mathbf{v}}_{t-1}, \bar{\alpha}_{t-1}), \mathbf{v}_{\psi}^* - \bar{\mathbf{v}}_{t-1} \rangle - \frac{L_{\mathbf{v}}}{2} \|\bar{\mathbf{v}}_{t-1} - \mathbf{v}_{\psi}^*\|^2 \leq f(\mathbf{v}_{\psi}^*, \bar{\alpha}_{t-1}), \tag{57}$$

and by  $L_{\mathbf{v}}$ -smoothness of  $f(\cdot)$  w.r.t.  $\mathbf{v}$ , we have

$$\begin{aligned}
 f(\bar{\mathbf{v}}_t, \alpha^*(\tilde{\mathbf{v}})) &\leq f(\bar{\mathbf{v}}_{t-1}, \alpha^*(\tilde{\mathbf{v}})) + \langle \nabla_{\mathbf{v}} f(\bar{\mathbf{v}}_{t-1}, \alpha^*(\tilde{\mathbf{v}})), \bar{\mathbf{v}}_t - \bar{\mathbf{v}}_{t-1} \rangle + \frac{L_{\mathbf{v}}}{2} \|\bar{\mathbf{v}}_t - \bar{\mathbf{v}}_{t-1}\|^2 \\
 &= f(\bar{\mathbf{v}}_{t-1}, \alpha^*(\tilde{\mathbf{v}})) + \langle \nabla_{\mathbf{v}} f(\bar{\mathbf{v}}_{t-1}, \alpha^*(\tilde{\mathbf{v}})), \bar{\mathbf{v}}_t - \bar{\mathbf{v}}_{t-1} \rangle + \frac{L_{\mathbf{v}}}{2} \|\bar{\mathbf{v}}_t - \bar{\mathbf{v}}_{t-1}\|^2 \\
 &\quad + \langle \nabla_{\mathbf{v}} f(\bar{\mathbf{v}}_{t-1}, \bar{\alpha}_{t-1}), \bar{\mathbf{v}}_t - \bar{\mathbf{v}}_{t-1} \rangle - \langle \nabla_{\mathbf{v}} f(\bar{\mathbf{v}}_{t-1}, \bar{\alpha}_{t-1}), \bar{\mathbf{v}}_t - \bar{\mathbf{v}}_{t-1} \rangle \\
 &= f(\bar{\mathbf{v}}_{t-1}, \alpha^*(\tilde{\mathbf{v}})) + \langle \nabla_{\mathbf{v}} f(\bar{\mathbf{v}}_{t-1}, \bar{\alpha}_{t-1}), \bar{\mathbf{v}}_t - \bar{\mathbf{v}}_{t-1} \rangle + \frac{L_{\mathbf{v}}}{2} \|\bar{\mathbf{v}}_t - \bar{\mathbf{v}}_{t-1}\|^2 \\
 &\quad + \langle \nabla_{\mathbf{v}} f(\bar{\mathbf{v}}_{t-1}, \alpha^*(\tilde{\mathbf{v}})) - \nabla_{\mathbf{v}} f(\bar{\mathbf{v}}_{t-1}, \bar{\alpha}_{t-1}), \bar{\mathbf{v}}_t - \bar{\mathbf{v}}_{t-1} \rangle \\
 &\stackrel{(a)}{\leq} f(\bar{\mathbf{v}}_{t-1}, \alpha^*(\tilde{\mathbf{v}})) + \langle \nabla_{\mathbf{v}} f(\bar{\mathbf{v}}_{t-1}, \bar{\alpha}_{t-1}), \bar{\mathbf{v}}_t - \bar{\mathbf{v}}_{t-1} \rangle + \frac{L_{\mathbf{v}}}{2} \|\bar{\mathbf{v}}_t - \bar{\mathbf{v}}_{t-1}\|^2 \\
 &\quad + G_{\alpha} |\bar{\alpha}_{t-1} - \alpha^*(\tilde{\mathbf{v}})| \|\bar{\mathbf{v}}_t - \bar{\mathbf{v}}_{t-1}\| \\
 &\stackrel{(b)}{\leq} f(\bar{\mathbf{v}}_{t-1}, \alpha^*(\tilde{\mathbf{v}})) + \langle \nabla_{\mathbf{v}} f(\bar{\mathbf{v}}_{t-1}, \bar{\alpha}_{t-1}), \bar{\mathbf{v}}_t - \bar{\mathbf{v}}_{t-1} \rangle + \frac{L_{\mathbf{v}}}{2} \|\bar{\mathbf{v}}_t - \bar{\mathbf{v}}_{t-1}\|^2 \\
 &\quad + \frac{\mu_{\alpha}}{6} |\bar{\alpha}_{t-1} - \alpha^*(\tilde{\mathbf{v}})|^2 + \frac{3G_{\alpha}^2}{2\mu_{\alpha}} \|\bar{\mathbf{v}}_t - \bar{\mathbf{v}}_{t-1}\|^2,
 \end{aligned} \tag{58}$$

where (a) holds because we know that  $\nabla_{\mathbf{v}} f(\cdot)$  is  $G_{\alpha} = 2 \max\{p, 1-p\}$ -Lipshitz w.r.t.  $\alpha$  by the definition of  $f(\cdot)$ , and (b) holds by Young's inequality.

By  $\frac{1}{\gamma}$ -strong convexity of  $\frac{1}{2\gamma} \|\mathbf{v} - \mathbf{v}_0\|^2$  w.r.t.  $\mathbf{v}$ , we have

$$\frac{1}{2\gamma} \|\bar{\mathbf{v}}_t - \mathbf{v}_0\|^2 + \frac{1}{\gamma} \langle \bar{\mathbf{v}}_t - \mathbf{v}_0, \mathbf{v}_{\psi}^* - \mathbf{v}_t \rangle + \frac{1}{2\gamma} \|\mathbf{v}_{\psi}^* - \mathbf{v}_t\|^2 \leq \frac{1}{2\gamma} \|\mathbf{v}_{\psi}^* - \mathbf{v}_0\|^2. \tag{59}$$

Adding (57), (58), (59), and rearranging terms, we have

$$\begin{aligned}
 &f(\bar{\mathbf{v}}_{t-1}, \bar{\alpha}_{t-1}) + f(\bar{\mathbf{v}}_t, \alpha^*(\tilde{\mathbf{v}})) + \frac{1}{2\gamma} \|\bar{\mathbf{v}}_t - \mathbf{v}_0\|^2 - \frac{1}{2\gamma} \|\mathbf{v}_{\psi}^* - \mathbf{v}_0\|^2 \\
 &\leq f(\mathbf{v}_{\psi}^*, \bar{\alpha}_{t-1}) + f(\bar{\mathbf{v}}_{t-1}, \alpha^*(\tilde{\mathbf{v}})) + \langle \nabla_{\mathbf{v}} f(\bar{\mathbf{v}}_{t-1}, \bar{\alpha}_{t-1}), \bar{\mathbf{v}}_t - \mathbf{v}_{\psi}^* \rangle + \frac{L_{\mathbf{v}} + 3G_{\alpha}^2/\mu_{\alpha}}{2} \eta^2 \|\bar{\mathbf{v}}_t - \bar{\mathbf{v}}_{t-1}\|^2 + \frac{L_{\mathbf{v}}}{2} \|\bar{\mathbf{v}}_{t-1} - \mathbf{v}_{\psi}^*\|^2 \\
 &\quad + \frac{\mu_{\alpha}}{6} (\bar{\alpha}_{t-1} - \alpha^*(\tilde{\mathbf{v}})) - \frac{1}{2\gamma} \|\mathbf{v}_{\psi}^* - \mathbf{v}_t\|^2 + \frac{1}{\gamma} \langle \bar{\mathbf{v}}_t - \mathbf{v}_0, \mathbf{v}_t - \mathbf{v}_{\psi}^* \rangle.
 \end{aligned} \tag{60}$$

By definition, we know that  $f(\cdot)$  is  $\mu_\alpha := 2p(1-p)$ -strong concavity w.r.t.  $\alpha$  ( $-f(\cdot)$  is  $\mu_\alpha$ -strong convexity w.r.t.  $\alpha$ ). Thus, we have

$$-f(\bar{\mathbf{v}}_{t-1}, \bar{\alpha}_{t-1}) - \nabla_\alpha f(\bar{\mathbf{v}}_{t-1}, \bar{\alpha}_{t-1})^T (\alpha^*(\tilde{\mathbf{v}}) - \bar{\alpha}_{t-1}) + \frac{\mu_\alpha}{2} (\alpha^*(\tilde{\mathbf{v}}) - \bar{\alpha}_{t-1})^2 \leq -f(\bar{\mathbf{v}}_{t-1}, \alpha^*(\tilde{\mathbf{v}})) \quad (61)$$

By definition, we know that  $f(\cdot)$  is smooth in  $\alpha$  (with coefficient  $L_\alpha := 2p(1-p)$ ), we get

$$\begin{aligned} -f(\mathbf{v}_\psi^*, \bar{\alpha}_t) &\leq -f(\mathbf{v}_\psi^*, \bar{\alpha}_{t-1}) - \langle \nabla_\alpha f(\mathbf{v}_\psi^*, \bar{\alpha}_{t-1}), \bar{\alpha}_t - \bar{\alpha}_{t-1} \rangle + \frac{L_\alpha}{2} (\bar{\alpha}_t - \bar{\alpha}_{t-1})^2 \\ &= -f(\mathbf{v}_\psi^*, \bar{\alpha}_{t-1}) - \langle \nabla_\alpha f(\mathbf{v}_\psi^*, \bar{\alpha}_{t-1}), \bar{\alpha}_t - \bar{\alpha}_{t-1} \rangle + \frac{L_\alpha}{2} (\bar{\alpha}_t - \bar{\alpha}_{t-1})^2 \\ &\quad - \langle \nabla_\alpha f(\bar{\mathbf{v}}_{t-1}, \bar{\alpha}_{t-1}), \bar{\alpha}_t - \bar{\alpha}_{t-1} \rangle + \langle \nabla_\alpha f(\bar{\mathbf{v}}_{t-1}, \bar{\alpha}_{t-1}), \bar{\alpha}_t - \bar{\alpha}_{t-1} \rangle \\ &\stackrel{(a)}{\leq} -f(\mathbf{v}_\psi^*, \bar{\alpha}_{t-1}) - \langle \nabla_\alpha f(\bar{\mathbf{v}}_{t-1}, \bar{\alpha}_{t-1}), \bar{\alpha}_t - \bar{\alpha}_{t-1} \rangle + \frac{L_\alpha}{2} (\bar{\alpha}_t - \bar{\alpha}_{t-1})^2 + G_\mathbf{v} |\langle \mathbf{v}_\psi^* - \bar{\mathbf{v}}_{t-1}, \bar{\alpha}_t - \bar{\alpha}_{t-1} \rangle| \\ &\leq -f(\mathbf{v}_\psi^*, \bar{\alpha}_{t-1}) - \langle \nabla_\alpha f(\bar{\mathbf{v}}_{t-1}, \bar{\alpha}_{t-1}), \bar{\alpha}_t - \bar{\alpha}_{t-1} \rangle + \frac{L_\alpha}{2} (\bar{\alpha}_t - \bar{\alpha}_{t-1})^2 + \frac{L_\mathbf{v}}{6} \|\bar{\mathbf{v}}_{t-1} - \mathbf{v}_\psi^*\|^2 + \frac{3G_\mathbf{v}^2}{2L_\mathbf{v}} (\bar{\alpha}_t - \bar{\alpha}_{t-1})^2, \end{aligned} \quad (62)$$

where (a) holds because  $\nabla_\alpha f(\cdot)$  is Lipschitz in  $\alpha$  with coefficient  $G_\mathbf{v} = 2 \max\{p, 1-p\} G_h$  by definition of  $f(\cdot)$ .

Adding (61), (62) and arranging terms, we have

$$\begin{aligned} -f(\bar{\mathbf{v}}_{t-1}, \bar{\alpha}_{t-1}) - f(\mathbf{v}_\psi^*, \bar{\alpha}_t) &\leq -f(\bar{\mathbf{v}}_{t-1}, \alpha^*(\tilde{\mathbf{v}})) - f(\mathbf{v}_\psi^*, \bar{\alpha}_{t-1}) - \langle \nabla_\alpha f(\bar{\mathbf{v}}_{t-1}, \bar{\alpha}_{t-1}), \bar{\alpha}_t - \alpha^*(\tilde{\mathbf{v}}) \rangle + \frac{L_\alpha}{2} \|\bar{\alpha}_t - \bar{\alpha}_{t-1}\|^2 \\ &\quad + \frac{L_\mathbf{v}}{6} \|\bar{\mathbf{v}}_{t-1} - \mathbf{v}_\psi^*\|^2 + \frac{3G_\mathbf{v}^2}{2L_\mathbf{v}} (\bar{\alpha}_t - \bar{\alpha}_{t-1})^2 - \frac{\mu_\alpha}{2} (\alpha^*(\tilde{\mathbf{v}}) - \bar{\alpha}_{t-1})^2. \end{aligned} \quad (63)$$

Adding (60) and (63), we get

$$\begin{aligned} &\left[ f(\bar{\mathbf{v}}_t, \alpha^*(\tilde{\mathbf{v}})) + \frac{1}{2\gamma} \|\bar{\mathbf{v}}_t - \mathbf{v}_0\|^2 \right] - \left[ f(\mathbf{v}_\psi^*, \bar{\alpha}_t) + \frac{1}{2\gamma} \|\mathbf{v}_\psi^* - \mathbf{v}_0\|^2 \right] \leq \\ &\langle \nabla_\mathbf{v} f(\bar{\mathbf{v}}_{t-1}, \bar{\alpha}_{t-1}), \bar{\mathbf{v}}_t - \mathbf{v}_\psi^* \rangle - \langle \nabla_\alpha f(\bar{\mathbf{v}}_{t-1}, \bar{\alpha}_{t-1}), \bar{\alpha}_t - \alpha^*(\tilde{\mathbf{v}}) \rangle \\ &\quad + \frac{L_\mathbf{v} + 3G_\mathbf{v}^2/\mu_\alpha}{2} \eta^2 \|\bar{\mathbf{v}}_t - \bar{\mathbf{v}}_{t-1}\|^2 + \left( \frac{L_\mathbf{v}}{6} + \frac{L_\mathbf{v}}{2} \right) \|\bar{\mathbf{v}}_{t-1} - \mathbf{v}_\psi^*\|^2 - \frac{1}{2\gamma} \|\mathbf{v}_\psi^* - \mathbf{v}_t\|^2 \\ &\quad + \frac{L_\alpha + 3G_\mathbf{v}^2/L_\mathbf{v}}{2} \eta^2 \|\bar{\alpha}_t - \bar{\alpha}_{t-1}\|^2 - \frac{\mu_\alpha}{3} (\bar{\alpha}_{t-1} - \alpha^*(\tilde{\mathbf{v}}))^2 \\ &\quad + \frac{1}{\gamma} \langle \bar{\mathbf{v}}_t - \mathbf{v}_0, \bar{\mathbf{v}}_t - \mathbf{v}_\psi^* \rangle. \end{aligned} \quad (64)$$

Applying  $\gamma = \frac{1}{2L_\mathbf{v}}$  to (64) and then plugging it into (56), we get

$$\begin{aligned} \psi(\tilde{\mathbf{v}}) - \min_{\mathbf{v}} \psi(\mathbf{v}) &\leq \frac{1}{T} \sum_{t=1}^T \left[ \langle \nabla_\mathbf{v} f(\bar{\mathbf{v}}_{t-1}, \bar{\alpha}_{t-1}), \bar{\mathbf{v}}_t - \mathbf{v}_\psi^* \rangle + 2L_\mathbf{v} \langle \bar{\mathbf{v}}_t - \mathbf{v}_0, \bar{\mathbf{v}}_t - \mathbf{v}_\psi^* \rangle + \langle \nabla_\alpha f(\bar{\mathbf{v}}_{t-1}, \bar{\alpha}_{t-1}), \alpha^*(\tilde{\mathbf{v}}) - \bar{\alpha}_t \rangle \right. \\ &\quad + \frac{L_\mathbf{v} + 3G_\mathbf{v}^2/\mu_\alpha}{2} \|\bar{\mathbf{v}}_t - \bar{\mathbf{v}}_{t-1}\|^2 + \frac{L_\alpha + 3G_\mathbf{v}^2/L_\mathbf{v}}{2} (\bar{\alpha}_t - \bar{\alpha}_{t-1})^2 \\ &\quad \left. + \frac{2L_\mathbf{v}}{3} \|\bar{\mathbf{v}}_{t-1} - \mathbf{v}_\psi^*\|^2 - L_\mathbf{v} \|\bar{\mathbf{v}}_t - \mathbf{v}_\psi^*\|^2 - \frac{\mu_\alpha}{3} (\bar{\alpha}_{t-1} - \alpha^*(\tilde{\mathbf{v}}))^2 \right]. \quad \square \end{aligned}$$

## E. Proof of Lemma 4

*Proof.* According to the update rule of  $\mathbf{v}$  and taking  $\gamma = \frac{1}{2L_\mathbf{v}}$ , we have

$$2L_\mathbf{v}(\mathbf{v}_t^k - \mathbf{v}_0) = -\nabla_\mathbf{v} F_k(\mathbf{v}_{t-1}^k, \alpha_{t-1}^k; \mathbf{z}_{t-1}^k) - \frac{1}{\eta} (\mathbf{v}_t^k - \mathbf{v}_{t-1}^k). \quad (65)$$

Taking average over  $K$  machines, we have

$$2L_{\mathbf{v}}(\bar{\mathbf{v}}_t - \mathbf{v}_0) = -\frac{1}{K} \sum_{k=1}^K \nabla_{\mathbf{v}} F_k(\mathbf{v}_{t-1}^k, \alpha_{t-1}^k; \mathbf{z}_{t-1}^k) - \frac{1}{\eta}(\bar{\mathbf{v}}_t - \bar{\mathbf{v}}_{t-1}). \quad (66)$$

It follows that

$$\begin{aligned} & \langle \nabla_{\mathbf{v}} f(\bar{\mathbf{v}}_{t-1}, \bar{\alpha}_{t-1}), \bar{\mathbf{v}}_t - \mathbf{v}_{\psi}^* \rangle + 2L_{\mathbf{v}} \langle \bar{\mathbf{v}}_t - \mathbf{v}_0, \bar{\mathbf{v}}_t - \mathbf{v}_{\psi}^* \rangle \\ &= \left\langle \frac{1}{K} \sum_{k=1}^K \nabla_{\mathbf{v}} f_k(\bar{\mathbf{v}}_{t-1}, \bar{\alpha}_{t-1}), \bar{\mathbf{v}}_t - \mathbf{v}_{\psi}^* \right\rangle - \left\langle \frac{1}{K} \sum_{k=1}^K \nabla_{\mathbf{v}} F_k(\mathbf{v}_{t-1}, \alpha_{t-1}^k; \mathbf{z}_{t-1}^k), \bar{\mathbf{v}}_t - \mathbf{v}_{\psi}^* \right\rangle + \frac{1}{\eta} \langle \bar{\mathbf{v}}_t - \bar{\mathbf{v}}_{t-1}, \bar{\mathbf{v}}_t - \mathbf{v}_{\psi}^* \rangle \\ &\leq \left\langle \frac{1}{K} \sum_{k=1}^K [\nabla_{\mathbf{v}} f_k(\bar{\mathbf{v}}_{t-1}, \bar{\alpha}_{t-1}) - \nabla_{\mathbf{v}} f_k(\bar{\mathbf{v}}_{t-1}, \alpha_{t-1}^k)], \bar{\mathbf{v}}_t - \mathbf{v}_{\psi}^* \right\rangle \quad \textcircled{1} \\ &\quad + \left\langle \frac{1}{K} \sum_{k=1}^K [\nabla_{\mathbf{v}} f_k(\bar{\mathbf{v}}_{t-1}, \alpha_{t-1}^k) - \nabla_{\mathbf{v}} f_k(\mathbf{v}_{t-1}, \alpha_{t-1}^k)], \bar{\mathbf{v}}_t - \mathbf{v}_{\psi}^* \right\rangle \quad \textcircled{2} \\ &\quad + \left\langle \frac{1}{K} \sum_{k=1}^K [\nabla_{\mathbf{v}} f_k(\mathbf{v}_{t-1}, \alpha_{t-1}^k) - \nabla_{\mathbf{v}} F_k(\mathbf{v}_{t-1}, \alpha_{t-1}^k; \mathbf{z}_{t-1}^k)], \bar{\mathbf{v}}_t - \mathbf{v}_{\psi}^* \right\rangle \quad \textcircled{3} \\ &\quad + \frac{1}{2\eta} (\|\bar{\mathbf{v}}_{t-1} - \mathbf{v}_{\psi}^*\|^2 - \|\bar{\mathbf{v}}_{t-1} - \bar{\mathbf{v}}_t\|^2 - \|\bar{\mathbf{v}}_t - \mathbf{v}_{\psi}^*\|^2). \end{aligned} \quad (67)$$

Then we will bound  $\textcircled{1}$ ,  $\textcircled{2}$  and  $\textcircled{3}$  separately,

$$\begin{aligned} \textcircled{1} &\stackrel{(a)}{\leq} \frac{3}{2L_{\mathbf{v}}} \left\| \frac{1}{K} \sum_{k=1}^K [\nabla_{\mathbf{v}} f_k(\bar{\mathbf{v}}_{t-1}, \bar{\alpha}_{t-1}) - \nabla_{\mathbf{v}} f_k(\bar{\mathbf{v}}_{t-1}, \alpha_{t-1}^k)] \right\|^2 + \frac{L_{\mathbf{v}}}{6} \|\bar{\mathbf{v}}_t - \mathbf{v}_{\psi}^*\|^2 \\ &\stackrel{(b)}{\leq} \frac{3}{2L_{\mathbf{v}}} \frac{1}{K} \sum_{k=1}^K \|\nabla_{\mathbf{v}} f_k(\bar{\mathbf{v}}_{t-1}, \bar{\alpha}_{t-1}) - \nabla_{\mathbf{v}} f_k(\bar{\mathbf{v}}_{t-1}, \alpha_{t-1}^k)\|^2 + \frac{L_{\mathbf{v}}}{6} \|\bar{\mathbf{v}}_t - \mathbf{v}_{\psi}^*\|^2 \\ &\stackrel{(c)}{\leq} \frac{3G_{\alpha}^2}{2L_{\mathbf{v}}} \frac{1}{K} \sum_{k=1}^K \|\bar{\alpha}_{t-1} - \alpha_{t-1}^k\|^2 + \frac{L_{\mathbf{v}}}{6} \|\bar{\mathbf{v}}_t - \mathbf{v}_{\psi}^*\|^2, \end{aligned} \quad (68)$$

where (a) follows from Young's inequality and (b) follows from Jensen's inequality. (c) holds because  $\nabla_{\mathbf{v}} f_k(\mathbf{v}, \alpha)$  is Lipschitz in  $\alpha$  with coefficient  $G_{\alpha} = 2 \max(p, 1-p)$  for any  $\mathbf{v}$  by definition of  $f_k(\cdot)$ . By similar techniques, we have

$$\begin{aligned} \textcircled{2} &\leq \frac{3}{2L_{\mathbf{v}}} \frac{1}{K} \sum_{k=1}^K \|\nabla_{\mathbf{v}} f_k(\bar{\mathbf{v}}_{t-1}, \alpha_{t-1}^k) - \nabla_{\mathbf{v}} f_k(\mathbf{v}_{t-1}, \alpha_{t-1}^k)\|^2 + \frac{L_{\mathbf{v}}}{6} \|\bar{\mathbf{v}}_t - \mathbf{v}_{\psi}^*\|^2 \\ &\leq \frac{3L_{\mathbf{v}}}{2} \frac{1}{K} \sum_{k=1}^K \|\bar{\mathbf{v}}_{t-1} - \mathbf{v}_{t-1}^k\|^2 + \frac{L_{\mathbf{v}}}{6} \|\bar{\mathbf{v}}_t - \mathbf{v}_{\psi}^*\|^2. \end{aligned} \quad (69)$$

Let  $\hat{\mathbf{v}}_t = \arg \min_{\mathbf{v}} \left( \frac{1}{K} \sum_{k=1}^K \nabla_{\mathbf{v}} f(\mathbf{v}_{t-1}^k, \alpha_{t-1}^k) \right)^T \mathbf{v} + \frac{1}{2\eta} \|\mathbf{v} - \bar{\mathbf{v}}_{t-1}\|^2 + \frac{1}{2\gamma} \|\mathbf{v} - \mathbf{v}_0\|^2$ . Then we have

$$\bar{\mathbf{v}}_t - \hat{\mathbf{v}}_t = \frac{\eta\gamma}{\eta + \gamma} \left( \nabla_{\mathbf{v}} f(\mathbf{v}_{t-1}^k, \alpha_{t-1}^k) - \frac{1}{K} \sum_{k=1}^K \nabla_{\mathbf{v}} f_k(\mathbf{v}_{t-1}^k, \alpha_{t-1}^k; \mathbf{z}_{t-1}^k) \right). \quad (70)$$

Hence we get

$$\begin{aligned}
 \textcircled{3} &= \left\langle \frac{1}{K} \sum_{k=1}^K [\nabla_{\mathbf{v}} f_k(\mathbf{v}_{t-1}^k, \alpha_{t-1}^k) - \nabla_{\mathbf{v}} F_k(\mathbf{v}_{t-1}^k, \alpha_{t-1}^k; \mathbf{z}_{t-1}^k)], \bar{\mathbf{v}}_t - \hat{\mathbf{v}}_t \right\rangle \\
 &+ \left\langle \frac{1}{K} \sum_{k=1}^K [\nabla_{\mathbf{v}} f_k(\mathbf{v}_{t-1}^k, \alpha_{t-1}^k) - \nabla_{\mathbf{v}} F_k(\mathbf{v}_{t-1}^k, \alpha_{t-1}^k; \mathbf{z}_{t-1}^k)], \hat{\mathbf{v}}_t - \mathbf{v}_{\psi}^* \right\rangle \\
 &= \frac{\eta\gamma}{\eta + \gamma} \left\| \frac{1}{K} \sum_{k=1}^K [\nabla_{\mathbf{v}} f_k(\mathbf{v}_{t-1}^k, \alpha_{t-1}^k) - \nabla_{\mathbf{v}} F_k(\mathbf{v}_{t-1}^k, \alpha_{t-1}^k; \mathbf{z}_{t-1}^k)] \right\|^2 \\
 &+ \left\langle \frac{1}{K} \sum_{k=1}^K [\nabla_{\mathbf{v}} f_k(\mathbf{v}_{t-1}^k, \alpha_{t-1}^k) - \nabla_{\mathbf{v}} F_k(\mathbf{v}_{t-1}^k, \alpha_{t-1}^k; \mathbf{z}_{t-1}^k)], \hat{\mathbf{v}}_t - \mathbf{v}_{\psi}^* \right\rangle \\
 &\leq \eta \left\| \frac{1}{K} \sum_{k=1}^K [\nabla_{\mathbf{v}} f_k(\mathbf{v}_{t-1}^k, \alpha_{t-1}^k) - \nabla_{\mathbf{v}} F_k(\mathbf{v}_{t-1}^k, \alpha_{t-1}^k; \mathbf{z}_{t-1}^k)] \right\|^2 \\
 &+ \left\langle \frac{1}{K} \sum_{k=1}^K [\nabla_{\mathbf{v}} f_k(\mathbf{v}_{t-1}^k, \alpha_{t-1}^k) - \nabla_{\mathbf{v}} F_k(\mathbf{v}_{t-1}^k, \alpha_{t-1}^k; \mathbf{z}_{t-1}^k)], \hat{\mathbf{v}}_t - \mathbf{v}_{\psi}^* \right\rangle
 \end{aligned} \tag{71}$$

Plugging (68), (69) and (71) into (67), we get

$$\begin{aligned}
 &\langle \nabla_{\mathbf{v}} f(\bar{\mathbf{v}}_{t-1}, \bar{\alpha}_{t-1}), \bar{\mathbf{v}}_t - \mathbf{v}_{\psi}^* \rangle + \frac{1}{\gamma} \langle \bar{\mathbf{v}}_t - \mathbf{v}_0, \bar{\mathbf{v}}_t - \mathbf{v}_{\psi}^* \rangle \\
 &\leq \frac{3G_{\alpha}^2}{2L_{\mathbf{v}}} \frac{1}{K} \sum_{k=1}^K \|\bar{\alpha}_{t-1} - \alpha_{t-1}^k\|^2 + \frac{L_{\mathbf{v}}}{6} \|\bar{\mathbf{v}}_t - \mathbf{v}_{\psi}^*\|^2 + \frac{3L_{\mathbf{v}}}{2} \frac{1}{K} \sum_{k=1}^K \|\bar{\mathbf{v}}_{t-1} - \mathbf{v}_{t-1}^k\|^2 + \frac{L_{\mathbf{v}}}{6} \|\bar{\mathbf{v}}_t - \mathbf{v}_{\psi}^*\|^2 \\
 &+ \eta \left\| \frac{1}{K} \sum_{k=1}^K [\nabla_{\mathbf{v}} f_k(\mathbf{v}_{t-1}^k, \alpha_{t-1}^k) - \nabla_{\mathbf{v}} F_k(\mathbf{v}_{t-1}^k, \alpha_{t-1}^k; \mathbf{z}_{t-1}^k)] \right\|^2 \\
 &+ \left\langle \frac{1}{K} \sum_{k=1}^K [\nabla_{\mathbf{v}} f_k(\mathbf{v}_{t-1}^k, \alpha_{t-1}^k) - \nabla_{\mathbf{v}} F_k(\mathbf{v}_{t-1}^k, \alpha_{t-1}^k; \mathbf{z}_{t-1}^k)], \hat{\mathbf{v}}_t - \mathbf{v}_{\psi}^* \right\rangle \\
 &+ \frac{1}{2\eta} (\|\bar{\mathbf{v}}_{t-1} - \mathbf{v}_{\psi}^*\|^2 - \|\bar{\mathbf{v}}_{t-1} - \bar{\mathbf{v}}_t\|^2 - \|\bar{\mathbf{v}}_t - \mathbf{v}_{\psi}^*\|^2). \square
 \end{aligned} \tag{72}$$

## F. Proof of Lemma 5

*Proof.*

$$\begin{aligned}
 \langle \nabla_{\alpha} f(\bar{\mathbf{v}}_{t-1}, \bar{\alpha}_{t-1}), \alpha^*(\tilde{\mathbf{v}}) - \bar{\alpha}_t \rangle &= \left\langle \frac{1}{K} \sum_{k=1}^K \nabla_{\alpha} f_k(\bar{\mathbf{v}}_{t-1}, \bar{\alpha}_{t-1}), \alpha^*(\tilde{\mathbf{v}}) - \bar{\alpha}_t \right\rangle \\
 &= \left\langle \frac{1}{K} \sum_{k=1}^K [\nabla_{\alpha} f_k(\bar{\mathbf{v}}_{t-1}, \bar{\alpha}_{t-1}) - \nabla_{\alpha} f_k(\bar{\mathbf{v}}_{t-1}, \alpha_{t-1}^k)], \alpha^*(\tilde{\mathbf{v}}) - \bar{\alpha}_t \right\rangle \quad \textcircled{4} \\
 &+ \left\langle \frac{1}{K} \sum_{k=1}^K [\nabla_{\alpha} f_k(\bar{\mathbf{v}}_{t-1}, \alpha_{t-1}^k) - \nabla_{\alpha} f_k(\mathbf{v}_{t-1}^k, \alpha_{t-1}^k)], \alpha^*(\tilde{\mathbf{v}}) - \bar{\alpha}_t \right\rangle \quad \textcircled{5} \\
 &+ \left\langle \frac{1}{K} \sum_{k=1}^K [\nabla_{\alpha} f_k(\mathbf{v}_{t-1}^k, \alpha_{t-1}^k) - \nabla_{\alpha} f_k(\mathbf{v}_{t-1}^k, \alpha_{t-1}^k; \mathbf{z}_{t-1}^k)], \alpha^*(\tilde{\mathbf{v}}) - \bar{\alpha}_t \right\rangle \quad \textcircled{6} \\
 &+ \left\langle \frac{1}{K} \sum_{k=1}^K \nabla_{\alpha} F_k(\mathbf{v}_{t-1}^k, \alpha_{t-1}^k; \mathbf{z}_{t-1}^k), \alpha^*(\tilde{\mathbf{v}}) - \bar{\alpha}_t \right\rangle \quad \textcircled{7}
 \end{aligned} \tag{73}$$

$$\begin{aligned}
 \textcircled{4} &\stackrel{(a)}{\leq} \frac{3}{2\mu_\alpha} \left( \frac{1}{K} \sum_{k=1}^K [\nabla_\alpha f_k(\bar{\mathbf{v}}_{t-1}, \bar{\alpha}_{t-1}) - \nabla_\alpha f_k(\bar{\mathbf{v}}_{t-1}, \alpha_{t-1}^k)] \right)^2 + \frac{\mu_\alpha}{6} (\bar{\alpha}_t - \alpha^*(\tilde{\mathbf{v}}))^2 \\
 &\stackrel{(b)}{\leq} \frac{3}{2\mu_\alpha} \frac{1}{K} \sum_{k=1}^K (\nabla_\alpha f_k(\bar{\mathbf{v}}_{t-1}, \bar{\alpha}_{t-1}) - \nabla_\alpha f_k(\bar{\mathbf{v}}_{t-1}, \alpha_{t-1}^k))^2 + \frac{\mu_\alpha}{6} (\bar{\alpha}_t - \alpha^*(\tilde{\mathbf{v}}))^2 \\
 &\stackrel{(c)}{\leq} \frac{3L_\alpha^2}{2\mu_\alpha} \frac{1}{K} \sum_{k=1}^K (\bar{\alpha}_{t-1} - \alpha_{t-1}^k)^2 + \frac{\mu_\alpha}{6} (\bar{\alpha}_t - \alpha^*(\tilde{\mathbf{v}}))^2,
 \end{aligned} \tag{74}$$

where (a) follows from Young's inequality, (b) follows from Jensen's inequality, and (c) holds because  $f_k(\mathbf{v}, \alpha)$  is smooth in  $\alpha$  with coefficient  $L_\alpha = 2p(1-p)$  for any  $\mathbf{v}$  by definition of  $f_k(\cdot)$ .

$$\begin{aligned}
 \textcircled{5} &\stackrel{(a)}{\leq} \frac{3}{2\mu_\alpha} \left\| \frac{1}{K} \sum_{k=1}^K [\nabla_\alpha f_k(\bar{\mathbf{v}}_{t-1}, \alpha_{t-1}^k) - \nabla_\alpha f_k(\mathbf{v}_{t-1}^k, \alpha_{t-1}^k)] \right\|^2 + \frac{\mu_\alpha}{6} (\alpha^*(\tilde{\mathbf{v}}) - \bar{\alpha}_t)^2 \\
 &\stackrel{(b)}{\leq} \frac{3}{2\mu_\alpha} \frac{1}{K} \sum_{k=1}^K \left\| \nabla_\alpha f_k(\bar{\mathbf{v}}_{t-1}, \alpha_{t-1}^k) - \nabla_\alpha f_k(\mathbf{v}_{t-1}^k, \alpha_{t-1}^k) \right\|^2 + \frac{\mu_\alpha}{6} (\alpha^*(\tilde{\mathbf{v}}) - \bar{\alpha}_t)^2 \\
 &\stackrel{(c)}{\leq} \frac{3G_\mathbf{v}^2}{2\mu_\alpha} \frac{1}{K} \sum_{k=1}^K \|\bar{\mathbf{v}}_{t-1} - \mathbf{v}_{t-1}^k\|^2 + \frac{\mu_\alpha}{6} (\alpha^*(\tilde{\mathbf{v}}) - \bar{\alpha}_t)^2,
 \end{aligned} \tag{75}$$

where (a) follows from Young's inequality, (b) follows from Jensen's inequality. (c) holds because  $\nabla_\alpha f_k(\mathbf{v}, \alpha)$  is Lipschitz in  $\mathbf{v}$  with coefficient  $G_\mathbf{v} = 2 \max(p, 1-p)G_h$  by definition of  $f_k(\cdot)$ .

Let  $\hat{\alpha}_t = \bar{\alpha}_{t-1} + \frac{\eta}{K} \sum_{k=1}^K \nabla_\alpha f_k(\mathbf{v}_{t-1}^k, \alpha_{t-1}^k)$ . Then we have

$$\bar{\alpha}_t - \hat{\alpha}_t = \eta \left( \frac{1}{K} \sum_{k=1}^K \nabla_\alpha F_k(\mathbf{v}_{t-1}^k, \alpha_{t-1}^k; \mathbf{z}_{t-1}^k) - \nabla_\alpha f_k(\mathbf{v}_{t-1}^k, \alpha_{t-1}^k) \right). \tag{76}$$

And for the auxiliary sequence  $\tilde{\alpha}_t$ , we can verify that

$$\tilde{\alpha}_t = \arg \min_\alpha \left( \frac{1}{K} \sum_{k=1}^K (\nabla_\alpha F_k(\mathbf{v}_{t-1}^k, \alpha_{t-1}^k; \mathbf{z}_{t-1}^k) - \nabla_\alpha f_k(\mathbf{v}_{t-1}^k, \alpha_{t-1}^k)) \right)^T \alpha + \frac{1}{2\eta} (\alpha - \tilde{\alpha}_{t-1})^2 := \lambda_{t-1}(\alpha). \tag{77}$$

Since  $\lambda_{t-1}(\alpha)$  is  $\frac{1}{\eta}$ -strongly convex, we have

$$\begin{aligned}
 & \frac{1}{2}(\alpha^*(\tilde{\mathbf{v}}) - \tilde{\alpha}_t)^2 \leq \lambda_{t-1}(\alpha^*(\tilde{\mathbf{v}})) - \lambda_{t-1}(\tilde{\alpha}_t) \\
 & = \left( \frac{1}{K} \sum_{k=1}^K (\nabla_{\alpha} F_k(\mathbf{v}_{t-1}^k, \alpha_{t-1}^k; \mathbf{z}_{t-1}^k) - \nabla_{\alpha} f_k(\mathbf{v}_{t-1}^k, \alpha_{t-1}^k)) \right)^T \alpha^*(\tilde{\mathbf{v}}) + \frac{1}{2\eta}(\alpha^*(\tilde{\mathbf{v}}) - \tilde{\alpha}_{t-1})^2 \\
 & \quad - \left( \frac{1}{K} \sum_{k=1}^K (\nabla_{\alpha} F_k(\mathbf{v}_{t-1}^k, \alpha_{t-1}^k; \mathbf{z}_{t-1}^k) - \nabla_{\alpha} f_k(\mathbf{v}_{t-1}^k, \alpha_{t-1}^k)) \right)^T \tilde{\alpha}_t - \frac{1}{2\eta}(\tilde{\alpha}_t - \tilde{\alpha}_{t-1})^2 \\
 & = \left( \frac{1}{K} \sum_{k=1}^K (\nabla_{\alpha} F_k(\mathbf{v}_{t-1}^k, \alpha_{t-1}^k; \mathbf{z}_{t-1}^k) - \nabla_{\alpha} f_k(\mathbf{v}_{t-1}^k, \alpha_{t-1}^k)) \right)^T (\alpha^*(\tilde{\mathbf{v}}) - \tilde{\alpha}_{t-1}) + \frac{1}{2\eta}(\alpha^*(\tilde{\mathbf{v}}) - \tilde{\alpha}_{t-1})^2 \\
 & \quad - \left( \frac{1}{K} \sum_{k=1}^K (\nabla_{\alpha} F_k(\mathbf{v}_{t-1}^k, \alpha_{t-1}^k; \mathbf{z}_{t-1}^k) - \nabla_{\alpha} f_k(\mathbf{v}_{t-1}^k, \alpha_{t-1}^k)) \right)^T (\tilde{\alpha}_t - \tilde{\alpha}_{t-1}) - \frac{1}{2\eta}(\tilde{\alpha}_t - \tilde{\alpha}_{t-1})^2 \\
 & \leq \left( \frac{1}{K} \sum_{k=1}^K (\nabla_{\alpha} F_k(\mathbf{v}_{t-1}^k, \alpha_{t-1}^k; \mathbf{z}_{t-1}^k) - \nabla_{\alpha} f_k(\mathbf{v}_{t-1}^k, \alpha_{t-1}^k)) \right)^T (\alpha^*(\tilde{\mathbf{v}}) - \tilde{\alpha}_{t-1}) + \frac{1}{2\eta}(\alpha^*(\tilde{\mathbf{v}}) - \tilde{\alpha}_{t-1})^2 \\
 & \quad + \frac{\eta}{2} \left( \frac{1}{K} \sum_{k=1}^K (\nabla_{\alpha} F_k(\mathbf{v}_{t-1}^k, \alpha_{t-1}^k; \mathbf{z}_{t-1}^k) - \nabla_{\alpha} f_k(\mathbf{v}_{t-1}^k, \alpha_{t-1}^k)) \right)^2.
 \end{aligned} \tag{78}$$

Hence we get

$$\begin{aligned}
 \textcircled{6} & = \left\langle \frac{1}{K} \sum_{k=1}^K [\nabla_{\alpha} f_k(\mathbf{v}_{t-1}^k, \alpha_{t-1}^k) - \nabla_{\alpha} F_k(\mathbf{v}_{t-1}^k, \alpha_{t-1}^k; \mathbf{z}_{t-1}^k)], \hat{\alpha}_t - \bar{\alpha}_t \right\rangle \\
 & \quad + \left\langle \frac{1}{K} \sum_{k=1}^K [\nabla_{\alpha} f_k(\mathbf{v}_{t-1}^k, \alpha_{t-1}^k) - \nabla_{\alpha} F_k(\mathbf{v}_{t-1}^k, \alpha_{t-1}^k; \mathbf{z}_{t-1}^k)], \alpha^*(\tilde{\mathbf{v}}) - \hat{\alpha}_t \right\rangle \\
 & = \eta \left( \frac{1}{K} \sum_{k=1}^K [\nabla_{\alpha} f_k(\mathbf{v}_{t-1}^k, \alpha_{t-1}^k) - \nabla_{\alpha} F_k(\mathbf{v}_{t-1}^k, \alpha_{t-1}^k; \mathbf{z}_{t-1}^k)] \right)^2 \\
 & \quad + \left\langle \frac{1}{K} \sum_{k=1}^K [\nabla_{\alpha} f_k(\mathbf{v}_{t-1}^k, \alpha_{t-1}^k) - \nabla_{\alpha} F_k(\mathbf{v}_{t-1}^k, \alpha_{t-1}^k; \mathbf{z}_{t-1}^k)], \alpha^*(\tilde{\mathbf{v}}) - \hat{\alpha}_t \right\rangle.
 \end{aligned} \tag{79}$$

Combining (78) and (79), we get

$$\begin{aligned}
 \textcircled{6} & \leq \frac{3\eta}{2} \left( \frac{1}{K} \sum_{k=1}^K [\nabla_{\alpha} f_k(\mathbf{v}_{t-1}^k, \alpha_{t-1}^k) - \nabla_{\alpha} F_k(\mathbf{v}_{t-1}^k, \alpha_{t-1}^k; \mathbf{z}_{t-1}^k)] \right)^2 \\
 & \quad + \left\langle \frac{1}{K} \sum_{k=1}^K [\nabla_{\alpha} f_k(\mathbf{v}_{t-1}^k, \alpha_{t-1}^k) - \nabla_{\alpha} F_k(\mathbf{v}_{t-1}^k, \alpha_{t-1}^k; \mathbf{z}_{t-1}^k)], \tilde{\alpha}_{t-1} - \hat{\alpha}_t \right\rangle \\
 & \quad + \frac{1}{2\eta}(\alpha^*(\tilde{\mathbf{v}}) - \tilde{\alpha}_{t-1})^2 - \frac{1}{2\eta}(\alpha^*(\tilde{\mathbf{v}}) - \tilde{\alpha}_t)^2.
 \end{aligned} \tag{80}$$

$\textcircled{7}$  can be bounded as

$$\textcircled{7} = \langle \bar{\alpha}_t - \tilde{\alpha}_{t-1}, \alpha^*(\tilde{\mathbf{v}}) - \bar{\alpha}_t \rangle = \frac{1}{2\eta} ((\bar{\alpha}_{t-1} - \alpha^*(\tilde{\mathbf{v}}))^2 - (\bar{\alpha}_{t-1} - \bar{\alpha}_t)^2 - (\bar{\alpha}_t - \alpha^*(\tilde{\mathbf{v}}))^2). \tag{81}$$



Adding (74), (75), (80) and (81), we get

$$\begin{aligned}
 \langle \nabla_{\alpha} f(\bar{\mathbf{v}}_{t-1}, \bar{\alpha}_{t-1}), \alpha^*(\tilde{\mathbf{v}}) - \bar{\alpha}_t \rangle &\leq \frac{3G_{\mathbf{v}}^2}{2\mu_{\alpha}} \frac{1}{K} \sum_{k=1}^K \|\bar{\mathbf{v}}_{t-1} - \mathbf{v}_{t-1}^k\|^2 + \frac{3L_{\alpha}^2}{2\mu_{\alpha}} \frac{1}{K} \sum_{k=1}^K (\bar{\alpha}_{t-1} - \alpha_{t-1}^k)^2 \\
 &+ \frac{3\eta}{2} \left( \frac{1}{K} \sum_{k=1}^K [\nabla_{\alpha} f_k(\mathbf{v}_{t-1}^k, \alpha_{t-1}^k) - \nabla_{\alpha} F_k(\mathbf{v}_{t-1}^k, \alpha_{t-1}^k; \mathbf{z}_{t-1})] \right)^2 \\
 &+ \frac{1}{K} \sum_{k=1}^K \langle \nabla_{\alpha} f_k(\mathbf{v}_{t-1}^k, \alpha_{t-1}^k) - \nabla_{\alpha} F_k(\mathbf{v}_{t-1}^k, \alpha_{t-1}^k; \mathbf{z}_{t-1}^k), \bar{\alpha}_{t-1} - \hat{\alpha}_t \rangle \\
 &+ \frac{1}{2\eta} ((\bar{\alpha}_{t-1} - \alpha^*(\tilde{\mathbf{v}}))^2 - (\bar{\alpha}_{t-1} - \bar{\alpha}_t)^2 - (\bar{\alpha}_t - \alpha^*(\tilde{\mathbf{v}}))^2) + \frac{\mu_{\alpha}}{3} (\bar{\alpha}_t - \alpha^*(\tilde{\mathbf{v}}))^2 \\
 &+ \frac{1}{2\eta} ((\alpha^*(\tilde{\mathbf{v}}) - \bar{\alpha}_{t-1}) - (\alpha^*(\tilde{\mathbf{v}}) - \bar{\alpha}_t)). \quad \square
 \end{aligned}$$

## G. Proof of Lemma 6

*Proof.* If  $I = 1$ ,  $\|\mathbf{v}_t^k - \bar{\mathbf{v}}_t^k\| = 0$  and  $|\alpha_t^k - \bar{\alpha}_t^k| = 0$  for any iteration  $t$  and any machine  $k$  since  $\mathbf{v}$  and  $\alpha$  are averaged across machines at each iteration.

We prove the case when  $I > 1$  in the following. For any iteration  $t$ , there must be an iteration with index  $t_0$  before  $t$  such that  $t \bmod I = 0$  and  $t - t_0 \leq I$ . Since  $\mathbf{v}$  and  $\alpha$  are averaged across machines at  $t_0$ , we have  $\bar{\mathbf{v}}_{t_0} = \mathbf{v}_{t_0}^k$ .

(1) For  $\mathbf{v}$ , according to the update rule,

$$\mathbf{v}_t^k = -\frac{\eta\gamma}{\eta + \gamma} \nabla_{\mathbf{v}} F_k(\mathbf{v}_{t-1}^k, \alpha_{t-1}^k; \mathbf{z}_{t-1}^k) + \frac{\gamma}{\eta + \gamma} \mathbf{v}_{t-1}^k + \frac{\eta}{\eta + \gamma} \mathbf{v}_0, \quad (82)$$

and hence

$$\bar{\mathbf{v}}_t = -\frac{\eta\gamma}{\eta + \gamma} \frac{1}{K} \sum_{k=1}^K \nabla_{\mathbf{v}} F_k(\mathbf{v}_{t-1}^k, \alpha_{t-1}^k; \mathbf{z}_{t-1}^k) + \frac{\gamma}{\eta + \gamma} \bar{\mathbf{v}}_{t-1} + \frac{\eta}{\eta + \gamma} \mathbf{v}_0. \quad (83)$$

Thus,

$$\begin{aligned}
 \|\bar{\mathbf{v}}_t - \mathbf{v}_t^k\| &\leq \frac{\eta\gamma}{\eta + \gamma} \left\| \nabla_{\mathbf{v}} F_k(\mathbf{v}_{t-1}^k, \alpha_{t-1}^k; \mathbf{z}_{t-1}^k) - \frac{1}{K} \sum_{i=1}^K \nabla_{\mathbf{v}} F_i(\mathbf{v}_{t-1}^i, \alpha_{t-1}^i; \mathbf{z}_{t-1}^i) \right\| + \frac{\gamma}{\eta + \gamma} \|\bar{\mathbf{v}}_{t-1} - \mathbf{v}_{t-1}^k\| \\
 &\leq 2B_{\mathbf{v}} \frac{\eta\gamma}{\eta + \gamma} + \frac{\gamma}{\eta + \gamma} \|\bar{\mathbf{v}}_{t-1} - \mathbf{v}_{t-1}^k\|.
 \end{aligned} \quad (84)$$

Since  $\bar{\mathbf{v}}_{t_0} = \mathbf{v}_{t_0}^k$  (for any  $k$ ), we can see  $\|\bar{\mathbf{v}}_{t_0+1} - \mathbf{v}_{t_0+1}^k\| \leq 2\frac{\eta\gamma}{\gamma + \eta} B_{\mathbf{v}} \leq 2\eta B_{\mathbf{v}}$ . Assuming  $\|\bar{\mathbf{v}}_{t-1} - \mathbf{v}_{t-1}^k\| \leq 2(t-1-t_0)\eta B_{\mathbf{v}}$ , then  $\|\bar{\mathbf{v}}_t - \mathbf{v}_t^k\| \leq 2(t-t_0)\eta B_{\mathbf{v}}$  by (84). Thus, by induction, we know that for any  $t$ ,  $\|\bar{\mathbf{v}}_t - \mathbf{v}_t^k\| \leq 2(t-t_0)\eta B_{\mathbf{v}} \leq 2\eta I B_{\mathbf{v}}$ . Hence proved.

(ii)

$$\alpha_t^k = \alpha_{t-1}^k + \eta \nabla_{\alpha} F_k(\mathbf{v}_{t-1}^k, \alpha_{t-1}^k; \mathbf{z}_{t-1}^k), \quad (85)$$

and

$$\bar{\alpha}_t = \bar{\alpha}_{t-1} + \eta \frac{1}{K} \sum_{k=1}^K \nabla_{\alpha} F_k(\mathbf{v}_{t-1}^k, \alpha_{t-1}^k; \mathbf{z}_{t-1}^k). \quad (86)$$

Thus,

$$\begin{aligned}
 |\bar{\alpha}_t - \alpha_t^k| &\leq |\bar{\alpha}_{t-1} - \alpha_{t-1}^k| + \eta \left| \nabla_{\alpha} F_k(\mathbf{v}_{t-1}^k, \alpha_{t-1}^k; \mathbf{z}_{t-1}^k) - \frac{1}{K} \sum_{i=1}^K \nabla_{\alpha} F_i(\mathbf{v}_{t-1}^i, \alpha_{t-1}^i; \mathbf{z}_{t-1}^i) \right| \\
 &\leq |\bar{\alpha}_{t-1} - \alpha_{t-1}^k| + 2\eta B_{\alpha}.
 \end{aligned} \quad (87)$$

Since  $\bar{\alpha}_{t_0} = \alpha_{t_0}^k$  (for any  $k$ ), we can see that  $\|\bar{\alpha}_{t_0+1} - \alpha_{t_0+1}^k\| \leq 2\eta B_\alpha$ . Assuming  $|\bar{\alpha}_{t-1} - \alpha_{t-1}^k| \leq 2(t-1-t_0)\eta B_\alpha$ , then  $|\bar{\alpha}_t - \alpha_t^k| \leq 2(t-t_0)\eta B_\alpha$ . Thus, by induction, we know that for any  $t$ ,  $\|\bar{\alpha}_t - \alpha_t^k\| \leq 2(t-t_0)\eta B_\alpha \leq 2\eta I B_\alpha$ . Hence proved.  $\square$

## H. More Experiments

In this section, we include more experimental results. Most of the settings are the same as in the Experiments section in the main paper, except that in Figure 10, we set  $I = I_0 * 3^{(s-1)}$ , other than set  $I$  to be a constant. This means that a later stage will communicate less frequently since the step size is decreased after each stage (see the first remark of Theorem 1).

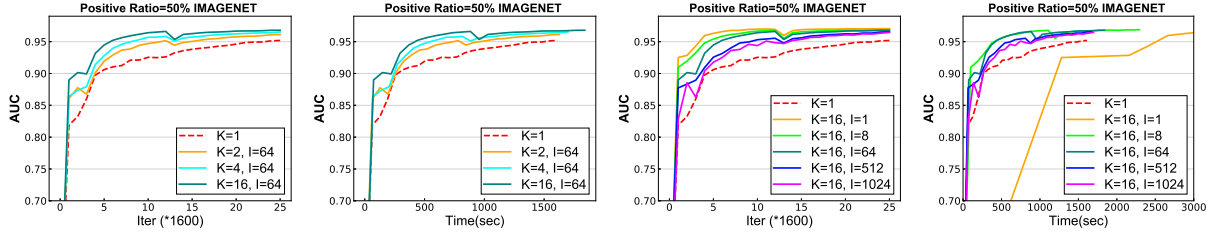

(a) Fix  $I$ , vary  $K$

(b) Fix  $K$ , vary  $I$

Figure 6. ImageNet, positive ratio = 50%.

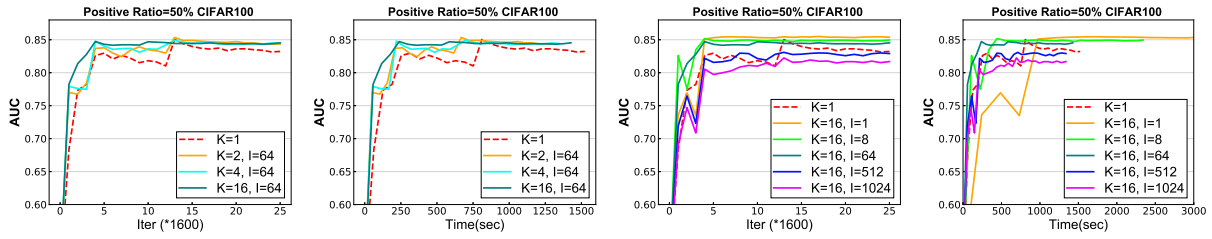

(a) Fix  $I$ , vary  $K$

(b) Fix  $K$ , vary  $I$

Figure 7. Cifar100, positive ratio = 50%.

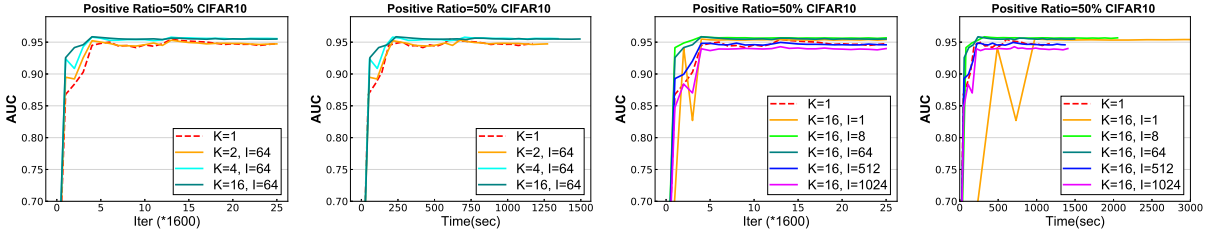

(a) Fix  $I$ , vary  $K$

(b) Fix  $K$ , vary  $I$

Figure 8. Cifar10, positive ratio = 50%.

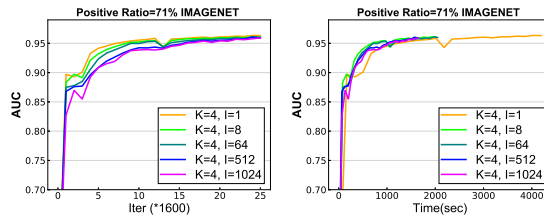

Figure 9. ImageNet, positive ratio=71%,  $K=4$ .

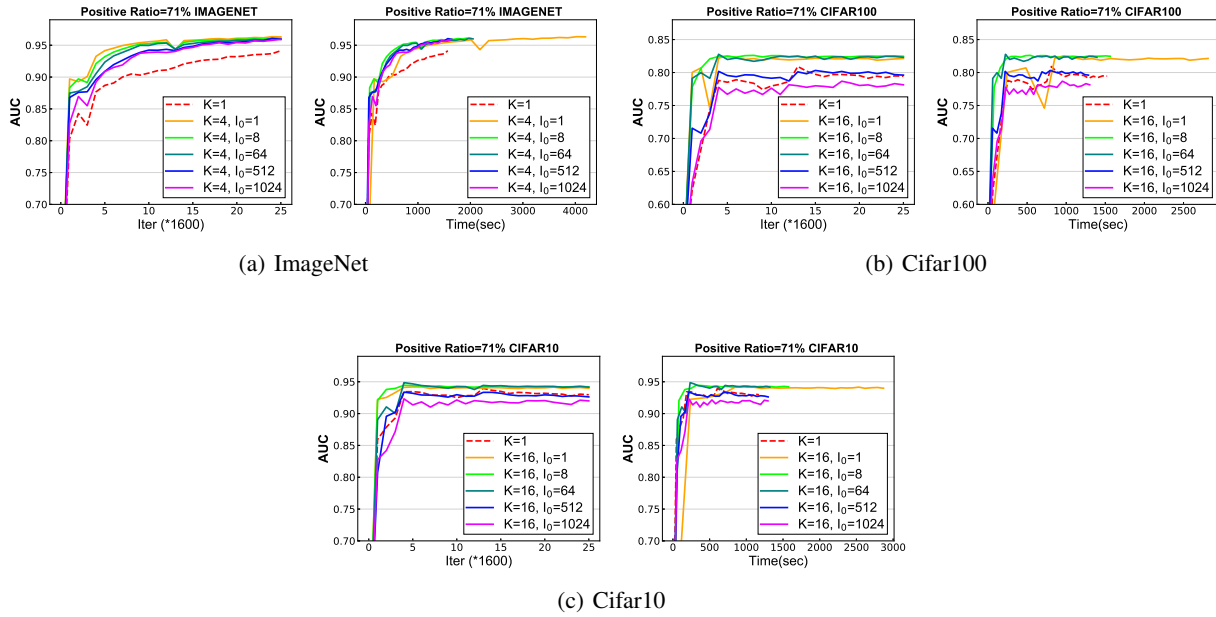

Figure 10.  $I_s = I_0 3^{(s-1)}$ , positive ratio = 71%.
